# Genome-Wide Identification, Evolutionary Expansion, and Expression Profile of Homeodomain-Leucine Zipper Gene Family in Poplar (*Populus trichocarpa*)

Ruibo Hu<sup>1</sup>, Xiaoyuan Chi<sup>2</sup>, Guohua Chai<sup>1</sup>, Yingzhen Kong<sup>3</sup>, Guo He<sup>1</sup>, Xiaoyu Wang<sup>1</sup>, Dachuan Shi<sup>1</sup>, Dongyuan Zhang<sup>1\*</sup>, Gongke Zhou<sup>1\*</sup>

**1** CAS Key Laboratory of Biofuels, Shandong Provincial Key Laboratory of Energy Genetics, Qingdao Institute of BioEnergy and BioProcess Technology, Chinese Academy of Sciences, Qingdao, Shandong, People's Republic of China, **2** Shandong Peanut Research Institute, Qingdao, Shandong, People's Republic of China, **3** Complex Carbohydrate Research Center, University of Georgia, Athens, Georgia, United States of America

## Abstract

**Background:** Homeodomain-leucine zipper (HD-ZIP) proteins are plant-specific transcriptional factors known to play crucial roles in plant development. Although sequence phylogeny analysis of *Populus* HD-ZIPs was carried out in a previous study, no systematic analysis incorporating genome organization, gene structure, and expression compendium has been conducted in model tree species *Populus* thus far.

**Principal Findings:** In this study, a comprehensive analysis of *Populus* HD-ZIP gene family was performed. Sixty-three full-length HD-ZIP genes were found in *Populus* genome. These *Populus* HD-ZIP genes were phylogenetically clustered into four distinct subfamilies (HD-ZIP I–IV) and predominately distributed across 17 linkage groups (LG). Fifty genes from 25 *Populus* paralogous pairs were located in the duplicated blocks of *Populus* genome and then preferentially retained during the sequential evolutionary courses. Genomic organization analyses indicated that purifying selection has played a pivotal role in the retention and maintenance of *Populus* HD-ZIP gene family. Microarray analysis has shown that 21 *Populus* paralogous pairs have been differentially expressed across different tissues and under various stresses, with five paralogous pairs showing nearly identical expression patterns, 13 paralogous pairs being partially redundant and three paralogous pairs diversifying significantly. Quantitative real-time RT-PCR (qRT-PCR) analysis performed on 16 selected *Populus* HD-ZIP genes in different tissues and under both drought and salinity stresses confirms their tissue-specific and stress-inducible expression patterns.

**Conclusions:** Genomic organizations indicated that segmental duplications contributed significantly to the expansion of *Populus* HD-ZIP gene family. Exon/intron organization and conserved motif composition of *Populus* HD-ZIPs are highly conservative in the same subfamily, suggesting the members in the same subfamilies may also have conservative functionalities. Microarray and qRT-PCR analyses showed that 89% (56 out of 63) of *Populus* HD-ZIPs were duplicate genes that might have been retained by substantial subfunctionalization. Taken together, these observations may lay the foundation for future functional analysis of *Populus* HD-ZIP genes to unravel their biological roles.

**Citation:** Hu R, Chi X, Chai G, Kong Y, He G, et al. (2012) Genome-Wide Identification, Evolutionary Expansion, and Expression Profile of Homeodomain-Leucine Zipper Gene Family in Poplar (*Populus trichocarpa*). PLoS ONE 7(2): e31149. doi:10.1371/journal.pone.0031149

**Editor:** Nicholas James Provart, University of Toronto, Canada

**Received:** June 20, 2011; **Accepted:** January 3, 2012; **Published:** February 16, 2012

**Copyright:** © 2012 Hu et al. This is an open-access article distributed under the terms of the Creative Commons Attribution License, which permits unrestricted use, distribution, and reproduction in any medium, provided the original author and source are credited.

**Funding:** This study was supported by grants from the National High-Tech Research and Development Program of China ("863" program, 2009AA10Z101 and 2011AA100209), the National Basic Research Program of China ("973" program, 2012CB114501), the National Natural Science Foundation of China (30901157 and 31000311), the Program of 100 Distinguished Young Scientists of the Chinese Academy of Sciences, the Promotive Research Fund for Young and Middle-aged Scientists of Shandong Province (BS2011SW055), and the Qingdao Municipal Science and Technology Plan Project (11-2-4-8-(2)-jch). The funders had no role in study design, data collection and analysis, decision to publish, or preparation of the manuscript.

**Competing Interests:** The authors have declared that no competing interests exist.

\* E-mail: zhangdy@qibebt.ac.cn (DZ); zhougk@qibebt.ac.cn (GZ)

## Introduction

Homeodomain (HD) proteins play fundamental roles in a diverse set of plant developmental processes, from pattern formation to cell type specification [1]. HD proteins constitute a large family of transcription factors with the HD DNA-binding domain at N-termini. In plants, HD proteins can be classified into 14 distinct families based on the sequence similarity of HD domains and their unique codomains [2]. Homeodomain-leucine zipper (HD-ZIP) genes are the most abundant group of HD genes

in plants but no HD-ZIP genes present in other eukaryotes. Unique features of HD-ZIP proteins are the presence of a HD domain and an adjacent Leucine Zipper (LZ) motif [3]. The HD domain is responsible for specific DNA binding, whereas the LZ motif mediates protein dimerization [4,5,6,7]. Based on the DNA-binding specificities, additional conserved motifs and their physiological functions, HD-ZIP genes are divided into four subfamilies (HD-ZIP I, II, III and IV) [7,8].

*Arabidopsis* HD-ZIP I subfamily has 17 members (*ATHB1/HAT5*, *ATHB3/HAT7*, *ATHB5-7*, *ATHB12*, *ATHB13*, *ATHB16*,

*ATHB20–23*, *ATHB40*, *ATHB51–54*) [9]. *Arabidopsis* HD-ZIP I genes are not only responsive to sugar signaling, abscisic acid (ABA) signaling and abiotic stresses, but also critical to plant embryogenesis and de-etiolation. *ATHB13* are potentially regulating sugar signaling [10] and *ATHB5*, *ATHB6*, *ATHB7*, and *ATHB12* have been proposed to participate in ABA-dependent and abiotic stress responses [11,12,13,14,15,16], of which *ATHB6* is a crucial regulator in the ABA signaling pathway [17]. *ATHB16* participates not only in blue-light signaling but also in leaf cell expansion [18], whereas *ATHB52* regulates photomorphogenesis and de-etiolation [9]. Other HD-ZIP I genes, such as *ATHB1*, *ATHB3*, *ATHB20*, and *ATHB23* are involved in cotyledon and leaf development [19,20] and *ATHB1* also responds to de-etiolation of dark-grown seedlings [19]. Recent progress shows that white spruce (*Picea glauca*) HD-ZIP I proteins also participate in ABA responses [21].

*Arabidopsis* HD-ZIP II subfamily consists of nine members (*ATHB2/HAT4*, *ATHB4*, *HAT1–HAT3*, *HAT9*, *HAT14*, *HAT17*, and *HAT22*) [22]. All nine members have a cellular redox status perceptive CPSCE (Cys, Pro, Ser, Cys, and Glu) motif at the downstream of LZ motif [23] and most of these genes are mainly respond to light, shading and auxin as revealed by genetic and biochemical analyses [24,25,26,27]. Both *ATHB2/HAT4* and *HAT2* regulate auxin-mediated morphogenesis in *Arabidopsis*. *ATHB2/HAT4* mediates red/far-red light effects on leaf cell expansion and shade avoidance intrigued by three distinct phytochromes [24,27]. *HAT2* is also auxin-inducible in *Arabidopsis* seedlings [26]. Ectopic expression of *HAT2* in *Arabidopsis*, consistent with the typical phenotypes of other auxin-overproducing mutants, produces a variety of phenotypic deviations with long hypocotyls, epinastic cotyledons, long petioles and small leaves [25]. Research on sunflowers also shows that their HD-ZIP II genes act as developmental regulators in response to illumination [28].

*Arabidopsis* HD-ZIP III subfamily comprises of only five genes, *PHABULOSA(PHB)/ATHB14*, *PHAVOLUTA(PHV)/ATHB9*, *REVOLUTA (REV)/INTERFASCICULAR FIBERLESS1(IFL1)*, *ATHB8*, and *CORONA(CNA)/ATHB15/INCURVATA4 (ICU4)* [29], but they are the key developmental regulators of *Arabidopsis* apical embryo patterning, shoot meristem formation, vascular differentiation, organ polarity determination, as well as auxin transportation [29,30,31,32,33,34,35,36]. Members of *Arabidopsis* HD-Zip III subfamily have an N-terminal putative steroid/lipid-binding START (STeroidogenic Acute Regulatory protein related lipid Transfer) domain, followed by an adjacent conserved SAD (START-adjacent) domain [37,38], and a C-terminal PAS-related MEKHLA domain that potentially involves in oxygen redox perception and light signaling [39]. Three closely related *Arabidopsis* HD-ZIP III genes, *REV/IFL1*, *PHB/ATHB9*, and *PHV/ATHB14*, act antagonistically with *KANADI* to regulate the establishment of apical meristem, vascular pattern, and adaxial domains in lateral organs [31,33,35,36]. These three HD-ZIP III genes have partially overlapping roles as the single mutants have only minor or even no apparent defects in interfascicular fiber formation as well as floral and lateral meristem initiation [29], but the *phb rev* and *phv reb* double mutants enhance these defects [29] and the *phb phv rev* triple mutants have no apical meristem but substituted by a single radialized cotyledon [29,31]. Another set of two closely related HD-ZIP III members, *ATHB8* and *CNA/ATHB15/ICU4*, act as regulators of vascular development [30,32,34], as *athb8* mutants bear no detectable phenotypes but constitutive expression of *ATHB8* triggers premature initiations of the secondary growth in xylem cells that eventually leads to the ectopic proliferation of xylem cells [30]. Additional evidences show

that *ATHB8* also regulates the initiation of procambial development, vein patterning and differentiation [40]. Genetic evidence also show that *CNA/ATHB15/ICU4* gene presumably acts as a negative regulator of procambial cell identity or proliferation because ectopic expression of a miRNA-resistant *CNA/ATHB15/ICU4* results in moderate dwarfing stature with drastic reduction in xylem and lignified interfascicular tissues, whereas antisense *ATHB15* transformants are severely dwarfed with expanded xylem and interfascicular fibers, and ectopic lignified pith [41]. Some other evidences show that the HD-Zip III family transcripts are also specifically targeted and thus negatively regulated by MiRNA165/166 [31,33,41,42,43,44,45].

In *Arabidopsis*, HD-ZIP IV (also known as HD-GL2) constitutes a large subfamily of genes composed of 16 members: *GLABRA2(GL2)/ATHB10*, *ARABIDOPSIS THALIANA MERISTEM LAYER1(ATML1)*, *ANTHOCYANINLESS2(ANL2)*, *PROTODERMAL FACTOR2 (PDF2)*, *HOMEODOMAIN GLABROUS 1(HDG1)–HDG5*, *HDG6/FWA*, and *HDG7–HDG12* [46]. HD-ZIP IV proteins have the similar domain arrangements to those of HD-ZIP III members but only lack of the C-terminal MEKHLA domain, suggesting that class III and IV HD-Zip gene families may share a common ancestor [7,38]. Genetic analysis shows that HD-ZIP IV proteins play crucial roles in epidermal cell differentiation, trichome formation, root development and anthocyanin accumulation. Three HD-ZIP IV genes, *GL2/ATHB10*, *ATML1*, and *PDF2*, appear to determinate the fate of epidermal layer cells [47,48,49,50,51]. The *GL2* determines trichome outgrowth in shoot epidermal cells as well as root hair cell specification as mutant *gl2* has impaired trichome and defected root hair [47,48,52]. Loss-of-function mutants of either *atml1* or *pdf2* mutants also show severe defects in shoot epidermal cell differentiation, and the *atml1 pdf2* double mutants fail to differentiate into protoderm during embryogenesis and thus are embryonic lethal [51]. Another set of HD-ZIP IV genes, *HDG11* and *HDG12*, repress trichome outgrowth. *hdg11* single mutant leads to excessive trichome branching and *hdg12* single mutant has no trichome, while the *hdg11 hdg12* double mutants have more excessive trichome branching [46]. *ANL2* regulates anthocyanin accumulation in leaf sub-epidermal layer as well as cell identity in root [53].

Compared to the largely investigated functions of *Arabidopsis* HD-ZIPs, only two *Populus* HD-ZIP genes (*POPREVOLUTA* and *POPCORONA*) have recently been characterized. These two HD-ZIP III genes are largely involved in regulating cell differentiation during secondary growth. Misexpression of *POPREVOLUTA (PRE)*, a *Populus* orthologue of *REV/IFL1* induces cambium initiation in abnormal positions and eventually causes patterning defects in derived secondary vascular tissues, even, to the extent of complete polarity reversals [54]. Overexpression of a miRNA-resistant *POPCORONA (PCN)*, a *Populus CNA/ATHB15/ICU4* orthologue shows delayed lignification of xylem and phloem fibers during secondary growth, whereas synthetic miRNA knockdown of *PCN* has abnormal lignification in pith cells [55].

Recently, a complete survey and classification of HD genes in ten different plant species from disparate evolutionary groups has already been carried out [2], however, only sequence phylogeny analyses of *Populus* HD-ZIPs are performed in the previous study and no detailed systematic analysis including genome organization, gene structure and expression compendium has been conducted. In this study, we first performed a genome-wide identification of HD-ZIP genes in *Populus* to reveal an expanded HD-ZIP family with totally 63 members, and then analyzed the sequence phylogeny, genome organization, gene structure, conserved motifs and expression profiling of these 63 genes.

Furthermore, a thorough comparative analysis of *Populus* HD-ZIP genes to those from seven other plant species was performed. We finally examined the gene expression patterns of 16 *Populus* HD-ZIP genes to verify the evolution origins of *Populus* HD-ZIP genes as well as to confirm their tissue-specific expression patterns and inducible expressions under drought and salt stresses. Our results presented here may provide a subset of potential candidate HD-ZIP genes for future engineering modifications of lignocellulosic biomass and stress tolerance characteristics in *Populus*.

## Results and Discussion

### Identification of HD-ZIP gene family in *Populus* and other plant species

To identify putative HD-ZIP genes in *Populus*, we performed a BLASTP search against *Populus* genome release v2.1 using HD-ZIP protein sequences in *Arabidopsis* as queries and the resulting sequences were used as secondary queries. By removing the redundant sequences, 63 HD-ZIP genes were identified in the *Populus* genome. All HD-ZIP candidates were manually analyzed using InterProScan program (<http://www.ebi.ac.uk/Tools/InterProScan/>) to verify the presence of HD and LZ domain. In a recently published report, a total of 61 HD-ZIP genes were identified in *Populus* by a genome-wide bioinformatics survey [2]. In this study, we further revealed three additional HD-ZIP genes in *Populus* and extended the total member to 63. We designated *Populus* HD-ZIP genes as *PtrHox* following the nomenclature proposed in the previous study [56]. The identified HD-ZIP genes in *Populus* encode proteins ranging from 170 to 855 amino acids (aa) in length with an average of 465 aa. In most cases, there are two or more *Populus* HD-ZIP genes for the orthologues in *Arabidopsis*, but in some cases, there are no orthologous *Populus* HD-ZIP genes in *Arabidopsis*. The detailed information of HD-ZIP family genes in *Populus*, including accession numbers and similarities to their *Arabidopsis* orthologues was listed in Table 1.

In order to gain insights into the evolutionary relationships among plant HD-ZIP proteins, we identified HD-ZIP genes from seven other plant species with whole genome sequences available, including moss (*Physcomitrella patens*), the monocotyledonous angiosperms *Oryza sativa*, *Sorghum bicolor* and *Brachypodium distachyon*, and the dicotyledonous angiosperms *Arabidopsis thaliana*, *Medicago truncatula* and *Vitis vinifera*. Strikingly, HD-ZIP gene family is apparently land plant-specific. All angiosperm genomes as well as the genome of the moss contained genes encoding HD-ZIP proteins, while no representatives were found in algae. A complete list of all HD-ZIP genes identified in the present study was provided in Table S2.

The number of HD-ZIP genes in *Populus* (63) is roughly 1.31 fold than that of *Arabidopsis* (48) and it is only second to its closest woody perennial grape (*Vitis vinifera*), which possesses 65 HD-ZIP genes. This expansion to more abundant HD-ZIP genes in *Populus* and grape genome suggests a great need of HD-ZIP genes to participate in more complicated transcriptional regulations of these two woody species.

### Phylogenetic analysis of HD-ZIP gene family

The abundance of *Populus* HD-ZIP genes to other plant species may derive from multiple gene duplication events, represented by a whole-genome duplication following multiple segmental and tandem duplications [57]. To verify this hypothesis, we first constructed a maximum likelihood phylogenetic tree by PHYML using the full-length HD-ZIP protein sequence alignments of eight different plant species to unveil the evolutionary relationships among plant HD-ZIP proteins. The HD-ZIP proteins of all eight

plant species were classified into four well-conserved subfamilies, HD-ZIP I to IV (Fig. 1A), the same as described previously and with significant statistical support [7,8]. The phylogenetic tree revealed that the plant HD-ZIP sequence distribution predominates with species bias (Fig. 1B). HD-ZIP I genes generally consisted of the largest subfamilies in the plant species except for *Brachypodium* and *Medicago* where HD-ZIP II and IV were the largest respectively. In contrast, HD-ZIP III genes composed of the fewest numbers of HD-ZIP members except for moss. It also appears that the numbers of *Populus* and grape HD-ZIP I and II genes were larger than these of other species. For instance, there were 27 and 21 HD-ZIP I members, 14 and 17 HD-ZIP II members in *Populus* and grape, respectively. In contrast, only 17 and 14 members in HD-ZIP I subfamily, 10 and 14 members in HD-ZIP II subfamily were present in *Arabidopsis* and rice, respectively. Species bias was also evident in subfamily IV. *Populus* and *Arabidopsis* were predominated with 17 and 16 HD-ZIP IV members but grape had only 12 HD-ZIP IV members nonetheless the number of grape HD-ZIP genes was larger than that of other species. In contrast to the much fewer members in subfamily IV, the number of grape HD-ZIPs showed an overwhelming predominance with 12 members present in subfamily III. Similarly, the number of moss HD-ZIPs in subfamily IV was particularly lower with four members compared to that of other species.

We further examined the subgroups within each HD-ZIP subfamilies. Consistent with the nomenclature in previous studies of *Arabidopsis* and rice [9,56], HD-ZIP I subfamily was divided into seven clades designated as clade  $\alpha$ ,  $\beta$ 1,  $\beta$ 2,  $\gamma$ ,  $\delta$ ,  $\epsilon$ ,  $\zeta$ , and  $\eta$  (Fig. 2). Clade  $\eta$  included 17 moss HD-ZIP I members clustered in the most basal clade with high statistical support, whereas clade  $\beta$ 1 was exclusively from eudicots (*Arabidopsis thaliana*, *Medicago truncatula*, *Vitis vinifera*, and *Populus*) and clade  $\zeta$  entirely from monocots (*Oryza sativa*, *Sorghum bicolor*, and *Brachypodium distachyon*). HD-ZIP II subfamily was divided into ten clades, from  $\alpha$  through  $\kappa$  (Fig. 3), with clades  $\alpha$  to  $\gamma$  designated in our study corresponding to the four major clades of *Arabidopsis* HD-ZIP II proteins as previously analyzed [22]. The  $\epsilon$  clade constituted a basal grade exclusively containing the moss members. The other three moss HD-ZIPs clustered together with members from eudicots and monocots in clade  $\alpha$ . Several clades including  $\beta$ ,  $\gamma$ , and  $\delta$  were composed of HD-ZIP proteins exclusively from eudicots. Similarly, clades  $\eta$ ,  $\iota$ , and  $\kappa$  were exclusively formed of proteins from monocot species. In contrast, clades  $\theta$  and  $\zeta$  included HD-ZIP proteins from both monocot and eudicot species. HD-ZIP III subfamily was classified into four clades designated as  $\alpha$ ,  $\beta$ ,  $\gamma$ , and  $\delta$  (Fig. 4). This classification generally agrees with the definitions of previous studies [29,58,59,60]. Clade  $\alpha$  had a basal node exclusively containing five moss members. Clade  $\beta$  included *Arabidopsis ATHB8* and *ATHB15/CNA* as well their orthologues in the other seven plant species, and clade  $\gamma$  contained *PHB*, *PHV* and their corresponding members. Subgroup  $\delta$  corresponded to the *REV* clade described in previous studies [29,58,60] and can be divided into eudicot- and monocot-specific subclades. HD-ZIP IV subfamily was clustered into four individual subgroups, designated clade  $\alpha$ ,  $\beta$ ,  $\gamma$ ,  $\delta$ , and  $\epsilon$  as in a previous study [46] (Fig. 5). Most of the HD-ZIP IV members have been functionally characterized in *Arabidopsis*. Clade  $\alpha$  consisted of *Arabidopsis ANL2*, a regulator of anthocyanin accumulation in leaf sub-epidermal layer and of cell identity in root [53]. Clade  $\beta$  included *Arabidopsis GL2* [47,48,52] and its orthologues, and Clade  $\gamma$  contained trichome formation genes, *HMG4*, *HMG5*, and *HMG8–12* [46]. Clade  $\epsilon$  was composed of *AtML1* and *PDF2* responsible for shoot epidermal cell differentiation [51]. Clade  $\delta$ , placed between clade  $\beta$  and  $\epsilon$ , consisted of four HD-ZIP III genes from moss.

**Table 1.** HD-ZIP gene family in *Populus*.

| Gene symbol  | Gene model (V2.1)      | Gene model (V1.1)                | <i>Arabidopsis</i> orthologue locus | <i>Arabidopsis</i> locus description | Score | E-value |
|--------------|------------------------|----------------------------------|-------------------------------------|--------------------------------------|-------|---------|
| PtrHox1      | POPTR_0001s02030.1     | fgenes4_pg.C_scaffold_29000247   | AT5G46880.1                         | HB7, HDG5                            | 775   | 0       |
| PtrHox2      | POPTR_0001s11380.1     | eugene3.00010699                 | AT2G46680.1                         | ATHB-7                               | 131   | 3E-31   |
| PtrHox3      | POPTR_0001s15490.1     | eugene3.00290072                 | AT4G16780.1                         | ATHB-2, HAT4                         | 335   | 2E-92   |
| PtrHox4      | POPTR_0001s18470.1     | fgenes4_pm.C_LG_I000546          | AT1G79840.1                         | GL2                                  | 941   | 0       |
| PtrHox5/PCN  | POPTR_0001s18930.1/HB5 | fgenes4_pm.C_LG_I000560          | AT1G52150.1                         | ATHB-15, CNA                         | 1467  | 0       |
| PtrHox6      | POPTR_0001s23680.1     | gw1.148.81.1                     | AT5G06710.1                         | HAT14                                | 268   | 4E-72   |
| PtrHox7      | POPTR_0001s38120.1/HB4 | estExt_fgenes4_pg.C_LG_I2905     | AT2G34710.1                         | PHB, ATHB-14                         | 1357  | 0       |
| PtrHox8      | POPTR_0001s40540.1     | gw1.146.127.1                    | AT5G53980.1                         | ATHB-52                              | 114   | 2E-26   |
| PtrHox9      | POPTR_0001s44540.1     | gw1.XIII.2898.1                  | AT4G04890.1                         | PDF2                                 | 420   | e-117   |
| PtrHox10     | POPTR_0002s10080.1     | estExt_fgenes4_pm.C_LG_II0461    | AT4G40060.1                         | ATHB-16                              | 191   | 6E-49   |
| PtrHox11     | POPTR_0002s11410.1     | estExt_fgenes4_pg.C_LG_II1036    | AT4G37790.1                         | HAT22                                | 210   | 8E-55   |
| PtrHox12     | POPTR_0002s13720.1     | estExt_fgenes4_pm.C_LG_II0606    | AT3G60390.1                         | HAT3                                 | 285   | 2E-77   |
| PtrHox13     | POPTR_0002s15610.1     | eugene3.00021438                 | AT4G00730.1                         | ANL2, AHDP                           | 1057  | 0       |
| PtrHox14     | POPTR_0002s17680.1     | fgenes4_pm.C_LG_II000817         | AT2G46680.1                         | ATHB-7                               | 219   | 1E-57   |
| PtrHox15     | POPTR_0002s23080.1     | estExt_fgenes4_pm.C_LG_II1004    | AT1G05230.2                         | HDG2                                 | 1154  | 0       |
| PtrHox16     | POPTR_0003s04860.1/HB6 | estExt_fgenes4_pg.C_LG_III0436   | AT1G52150.1                         | ATHB-15, CNA                         | 1488  | 0       |
| PtrHox17     | POPTR_0003s05100.1     | estExt_fgenes4_pg.C_LG_III0408   | AT1G79840.1                         | GL2                                  | 948   | 0       |
| PtrHox18     | POPTR_0003s07760.1     | fgenes4_pm.C_LG_III000187        | AT4G16780.1                         | ATHB-2, HAT4                         | 320   | 8E-88   |
| PtrHox19     | POPTR_0003s09470.1     | gw1.III.2514.1                   | AT5G46880.1                         | HB7, HDG5                            | 836   | 0       |
| PtrHox20     | POPTR_0003s14700.1     | /                                | AT2G46680.1                         | ATHB-7                               | 110   | 5e-25   |
| PtrHox21     | POPTR_0004s01980.1     | fgenes4_pg.C_LG_IV000079         | AT4G04890.1                         | PDF2                                 | 1186  | 0       |
| PtrHox22     | POPTR_0004s07310.1     | gw1.IV.3966.1                    | AT1G73360.1                         | HDG11,EDT1                           | 631   | 0       |
| PtrHox23/PRE | POPTR_0004s22090.1/HB2 | estExt_Genewise1_v1.C_660759     | AT5G60690.1                         | REV, IFL                             | 1375  | 0       |
| PtrHox24     | POPTR_0005s07290.1     | /                                | AT4G40060.1                         | ATHB-16                              | 244   | 4E-65   |
| PtrHox25     | POPTR_0005s12760.1     | estExt_fgenes4_pg.C_570199       | AT2G18550.1                         | HB2, ATHB-21                         | 202   | 9E-53   |
| PtrHox26     | POPTR_0005s17390.2     | estExt_Genewise1_v1.C_LG_V4715   | AT4G40060.1                         | ATHB-16                              | 186   | 9E-48   |
| PtrHox27     | POPTR_0005s19080.1     | gw1.V.4364.1                     | AT4G37790.1                         | HAT22                                | 265   | 2E-71   |
| PtrHox28     | POPTR_0006s07100.1     | fgenes4_pg.C_LG_VI000532         | AT5G06710.1                         | HAT14                                | 163   | 8E-41   |
| PtrHox29     | POPTR_0006s11890.1     | gw1.28.964.1                     | AT5G03790.1                         | ATHB51, LMI1                         | 181   | 4E-46   |
| PtrHox30     | POPTR_0006s20820.1     | fgenes4_pm.C_LG_VI000496         | AT5G06710.1                         | HAT14                                | 249   | 1E-66   |
| PtrHox31     | POPTR_0006s25390.1/HB8 | estExt_fgenes4_pm.C_LG_VI0713    | AT4G32880.1                         | ATHB-8                               | 1404  | 0       |
| PtrHox32     | POPTR_0007s01370.1     | fgenes4_pg.C_LG_VII000112        | AT4G36740.1                         | HB-5, ATHB40                         | 78    | 3E-15   |
| PtrHox33     | POPTR_0007s05010.1     | gw1.VII.1686.1                   | AT2G22430.1                         | ATHB-6                               | 248   | 4E-66   |
| PtrHox34     | POPTR_0007s12450.1     | grail3.0019015601                | AT4G36740.1                         | HB-5, ATHB40                         | 208   | 2E-54   |
| PtrHox35     | POPTR_0007s14590.1     | estExt_Genewise1_v1.C_LG_VII0041 | AT4G37790.1                         | HAT22                                | 299   | 1E-81   |
| PtrHox36     | POPTR_0008s12840.1     | /                                | AT2G01430.1                         | ATHB-17                              | 206   | 1E-53   |
| PtrHox37     | POPTR_0008s14770.1     | estExt_fgenes4_pg.C_LG_VIII1313  | AT1G69780.1                         | ATHB-13                              | 333   | 1E-91   |
| PtrHox38     | POPTR_0008s19900.1     | eugene3.00081839                 | AT5G15150.1                         | ATHB-3, HAT7                         | 122   | 4E-28   |
| PtrHox39     | POPTR_0009s01990.1/HB1 | gw1.IX.4748.1                    | AT5G60690.1                         | REV, IFL                             | 1367  | 0       |
| PtrHox40     | POPTR_0009s02850.1     | /                                | AT5G06710.1                         | HAT14                                | 242   | 3E-64   |
| PtrHox41     | POPTR_0010s10340.1     | estExt_fgenes4_pg.C_LG_X0852     | AT1G69780.1                         | ATHB-13                              | 308   | 2E-84   |
| PtrHox42     | POPTR_0010s12300.1     | eugene3.00101057                 | AT2G01430.1                         | ATHB-17                              | 214   | 3E-56   |
| PtrHox43     | POPTR_0011s00520.1     | eugene3.00110213                 | AT4G04890.1                         | PDF2                                 | 1164  | 0       |
| PtrHox44     | POPTR_0011s10070.1/HB3 | estExt_fgenes4_pg.C_2360002      | AT2G34710.1                         | PHB, ATHB-14                         | 1351  | 0       |
| PtrHox45     | POPTR_0011s11510.1     | gw1.XI.3740.1                    | AT5G53980.1                         | ATHB-52                              | 114   | 4E-26   |
| PtrHox46     | POPTR_0012s03080.1     | gw1.XII.940.1                    | AT2G46680.1                         | ATHB-7                               | 147   | 5E-36   |
| PtrHox47     | POPTR_0012s03550.1     | estExt_fgenes4_pm.C_LG_XII0033   | AT1G73360.1                         | HDG11,EDT1                           | 885   | 0       |
| PtrHox48     | POPTR_0012s07270.1     | grail3.0015005801                | AT3G01470.1                         | ATHB-1, HAT5                         | 145   | 4E-35   |

Table 1. Cont.

| Gene symbol | Gene model (V2.1)      | Gene model (V1.1)               | <i>Arabidopsis</i> orthologue locus | <i>Arabidopsis</i> locus description | Score | E-value |
|-------------|------------------------|---------------------------------|-------------------------------------|--------------------------------------|-------|---------|
| PtrHox49    | POPTR_0012s13390.1     | fgenes4_pg.C_LG_XII001156       | AT4G00730.1                         | ANL2, AHDP                           | 838   | 0       |
| PtrHox50    | POPTR_0014s04460.1     | /                               | AT3G60390.1                         | HAT3                                 | 263   | 8E-71   |
| PtrHox51    | POPTR_0014s07130.1     | fgenes4_pg.C_LG_XIV000202       | AT4G00730.1                         | ANL2, AHDP                           | 1045  | 0       |
| PtrHox52    | POPTR_0014s09860.1     | eugene3.00140486                | AT2G46680.1                         | ATHB-7                               | 237   | 5E-63   |
| PtrHox53    | POPTR_0014s15010.1     | estExt_fgenes4_pm.C_LG_XIV0411  | AT1G05230.2                         | HDG2                                 | 1174  | 0       |
| PtrHox54    | POPTR_0015s05050.1     | fgenes4_pg.C_scaffold_122000084 | AT1G73360.1                         | HDG11,EDT1                           | 917   | 0       |
| PtrHox55    | POPTR_0015s07640.1     | fgenes4_pm.C_LG_XV000148        | AT3G01470.1                         | ATHB-1, HAT5                         | 135   | 2E-32   |
| PtrHox56    | POPTR_0015s13340.1     | eugene3.00151195                | AT4G00730.1                         | ANL2, AHDP                           | 828   | 0       |
| PtrHox57    | POPTR_0016s05890.1     | /                               | AT5G06710.1                         | HAT14                                | 242   | 2E-64   |
| PtrHox58    | POPTR_0017s01400.1     | gw1.44.578.1                    | AT1G73360.1                         | HDG11,EDT1                           | 606   | e-173   |
| PtrHox59    | POPTR_0017s04820.1     | eugene3.00640210                | AT4G36740.1                         | HB-5, ATHB40                         | 79    | 2E-15   |
| PtrHox60    | POPTR_0017s11800.1     | gw1.XVII.1044.1                 | AT5G15150.1                         | ATHB3, HAT7                          | 248   | 3E-66   |
| PtrHox61    | POPTR_0018s08110.1/HB7 | fgenes4_pg.C_LG_XVIII000250     | AT4G32880.1                         | ATHB-8                               | 1389  | 0       |
| PtrHox62    | POPTR_0018s13300.1     | eugene3.00181192                | AT5G06710.1                         | HAT14                                | 155   | 2E-38   |
| PtrHox63    | POPTR_0149s00220.1     | gw1.XVI.1869.1                  | AT5G06710.1                         | HAT14                                | 239   | 1E-63   |

Gene loci are from the Phytozome website (<http://www.phytozome.net/poplar>, release 2.1). A complete list of the coding sequences (CDS), deduced amino acid sequences and genomic DNA sequences is available in Table S1.  
doi:10.1371/journal.pone.0031149.t001

Tree topology displayed that the majority of HD-ZIP genes tend to cluster in eudicot- and monocot-specific patterns, especially within subgroups harboring large members, i.e., clades  $\beta 2$ ,  $\gamma$ , and  $\epsilon$  in HD-ZIP I subfamily, clades  $\gamma$  and  $\delta$  in HD-ZIP III, and clades  $\alpha$ ,  $\gamma$ , and  $\epsilon$  in HD-ZIP IV. This substantial lineage-specific pattern suggests that HD-ZIP genes in these subgroups may be expanded and then diversified after the monocot-eudicot radiation so that these genes were acquired or differentially retained in eudicot genomes after their divergences from monocots. Nonetheless, a small number of the HD-ZIP members were presented in both monocots and eudicots in several clades such as clades  $\theta$  and  $\zeta$  in HD-ZIP II, which suggests that the expansion of these HD-ZIPs might predate the divergence of eudicots and monocots.

Phylogenetic tree topology further revealed that 28 *Populus* HD-ZIP pairs at the terminal nodes of each subfamily shared high degrees of sequence similarities and were assigned as paralogous pairs (homologous genes that diverged by gene duplication) (Fig. 2, 3, 4, and 5). These 28 paralogous pairs of HD-ZIP proteins, accounting for more than 89% of the entire HD-ZIP family, had sequence similarity ranging from 62% to 95% (Table S3).

### Chromosomal location and gene duplication of *Populus* HD-ZIP genes

In silico mapping of the gene loci showed that totally 62 *Populus* HD-ZIP genes were mapped to linkage groups (LG) currently, with only one gene (*PtrHox63*) remained on as yet unmapped scaffolds (Fig. 6). The 62 *Populus* HD-ZIP genes were distributed across all LGs, except for LGXIII and IXI. LG I had the largest number of nine HD-ZIP genes followed by six on LG II and five on LG III, respectively. In contrast, only one HD-ZIP gene was found on LG XVI and two HD-ZIP genes on LG IX, XI, and XVIII, respectively. No substantial clustering of *Populus* HD-ZIP genes was present, even on the LGs with high densities of HD-ZIP genes.

Previous studies revealed that *Populus* genome has undergone at least three rounds of genome-wide duplications followed by multiple segmental duplication, tandem duplication, and transpo-

sition events such as retroposition and replicative transposition [57]. Particularly, the segmental duplication associated with the salicoid duplication event occurred 65 million years (MY) ago remarkably contributed to the expansion of many multi-gene families [61,62,63,64,65,66]. To determine the possible relationship between the HD-ZIP genes and potential segmental duplications, we mapped *Populus* HD-ZIPs to the duplicated blocks established in the previous studies [57]. The distributions of HD-ZIP genes relative to the corresponding duplicate blocks were illustrated in Figure 6. Within the identified duplicated blocks associated with the recent salicoid duplication event, about 81% (50 of 62) of *Populus* HD-ZIPs were preferentially retained duplicates that located in both duplicated regions. Six duplicated blocks only contained HD-ZIPs (*PtrHox2*, 9, 20, 27, and 38) on one of the blocks and lacked duplicates on the corresponding block, suggesting that dynamic rearrangement may have occurred following the segmental duplication, which led to loss of some of the genes. In contrast, only a small number of six HD-ZIP genes (*PtrHox11*, 29, 30, 35, 57, and 60) were located outside of any duplicated blocks. None of HD-ZIP genes was represented in distinct tandem duplicate gene clusters, indicating that tandem duplications do not seem to play an important role on the expansion of the HD-ZIP gene family in *Populus*.

Evidence of salicoid segmental duplications was present in all HD-ZIP subfamilies, particularly in the HD-ZIP III and HD-ZIP IV subfamilies. HD-ZIP III subfamily had the highest rate of segmental duplications among the four subfamilies, with every member impacted by segmental duplications. Similarly, the vast majority genes in HD-ZIP IV except for *PtrHox9*, accounting for 94.7% of the total subfamily, were impacted by segmental duplications. In comparison, segmental duplications were relatively under-presented in subfamilies HD-ZIP I and II, with rates of 70% (14 out of 20) and 67% (12 out of 18), respectively.

To explore whether other mechanisms contributed towards the expansion of the duplicated genes, we also searched for the presence of transposons and retrotransposons in the flanking

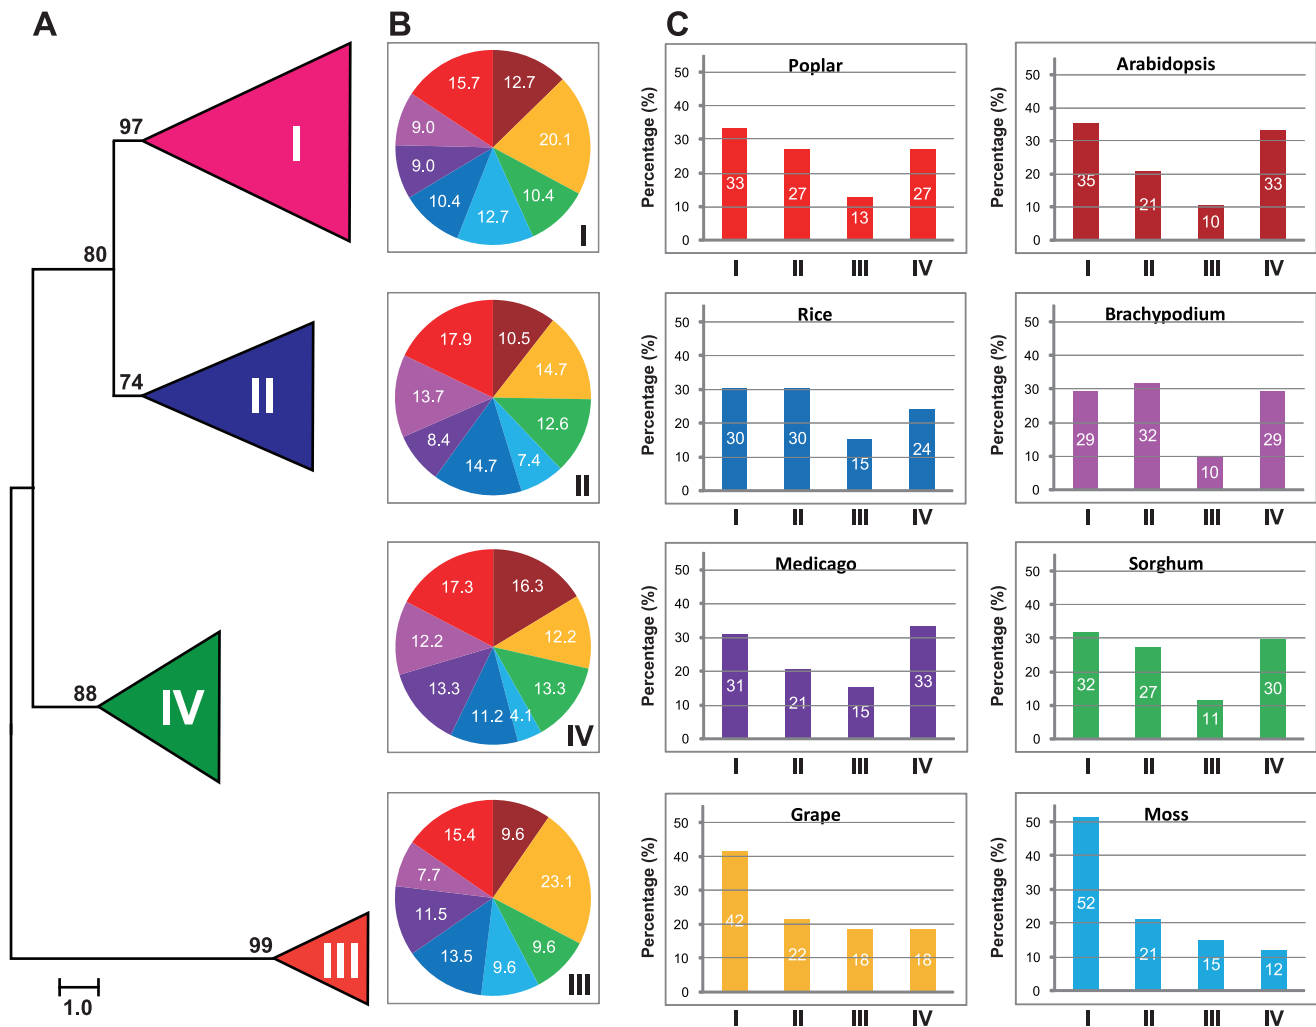

**Figure 1. Phylogeny and distribution of HD-ZIP protein from eight plant species.** **A.** Phylogenetic tree of HD-ZIP proteins from *Arabidopsis*, rice, *Medicago*, sorghum, *Brachypodium*, *Populus*, *Vitis*, and moss. Phylogeny was constructed by PhyML using maximum likelihood analysis. Bootstrap support values as percentage, are shown on selected major branches. The scale bar indicates the estimated number of amino acid substitutions per site. **B.** Percentage representation of HD-ZIP across the eight plant species within each subfamily. Colors correspond to the plant taxa as listed in C. **C.** Percentage representation of distributions for HD-ZIP within each plant species. doi:10.1371/journal.pone.0031149.g001

genomic sequences of 10-kb upstream and downstream of each HD-ZIP gene. However, there was very limited contribution of transposons/retrotransposons to the expansion of HD-ZIP gene family in *Populus* (data not shown).

Based primarily on the genomic organization of HD-ZIP genes, we are attempting to speculate that segmental duplications exclusively contributed to the expansion of *Populus* HD-ZIP gene family. Similarly, segmental duplications have also been shown to contribute to the expansion of other multi-gene families in *Populus* [61,62,63,64,65,66,67]. Our results indicated that *Populus* HD-ZIP genes have been preferentially retained at a relatively high rate of 81%. This number is much higher than the average rate following the salicoid genome-wide duplication in the *Populus* lineage, in which approximately 33% of predicted genes are retained in duplications resulting from the salicoid duplication event on the genome-wide scale [57]. The high retention rates of duplicated genes are also found in other gene families of *Populus* [62,63,68]. These findings corroborates previous findings that genes involved in transcription regulation and signal transduction are preferentially retained

following duplications [69,70,71]. Another plausible explanation to the relatively high retention rate of duplicate genes in HD-ZIP gene family may lie in the fact that *Populus* genome has been indicated to evolve at a much slower rate compared to *Arabidopsis* [57].

As a large proportion of HD-ZIP proteins appear to be paralogous pairs unveiled by the phylogenetic analysis, we further investigated whether traceable genome duplication events have contributed to the expansion of the HD-ZIP family. Of 28 HD-ZIP paralogous pairs we examined, 25 paralogous pairs remained in conserved positions on segmental duplicated blocks (Fig. 6), suggesting that these 25 paralogous pairs may be derived from segmental duplication event during the evolutionary process. No traceable duplication events could be inferred for only three paralogous pairs (*PtrHox2/20*, *PtrHox27/35*, and *PtrHox30/57*). Among them, three genes (*PtrHox30*, *35*, and *57*) were located outside of any segmental duplication blocks. Although the other three genes (*PtrHox2*, *20*, and *27*) were located on the duplicated blocks, their paralogous counterparts appeared to have lost from the *Populus* genome.



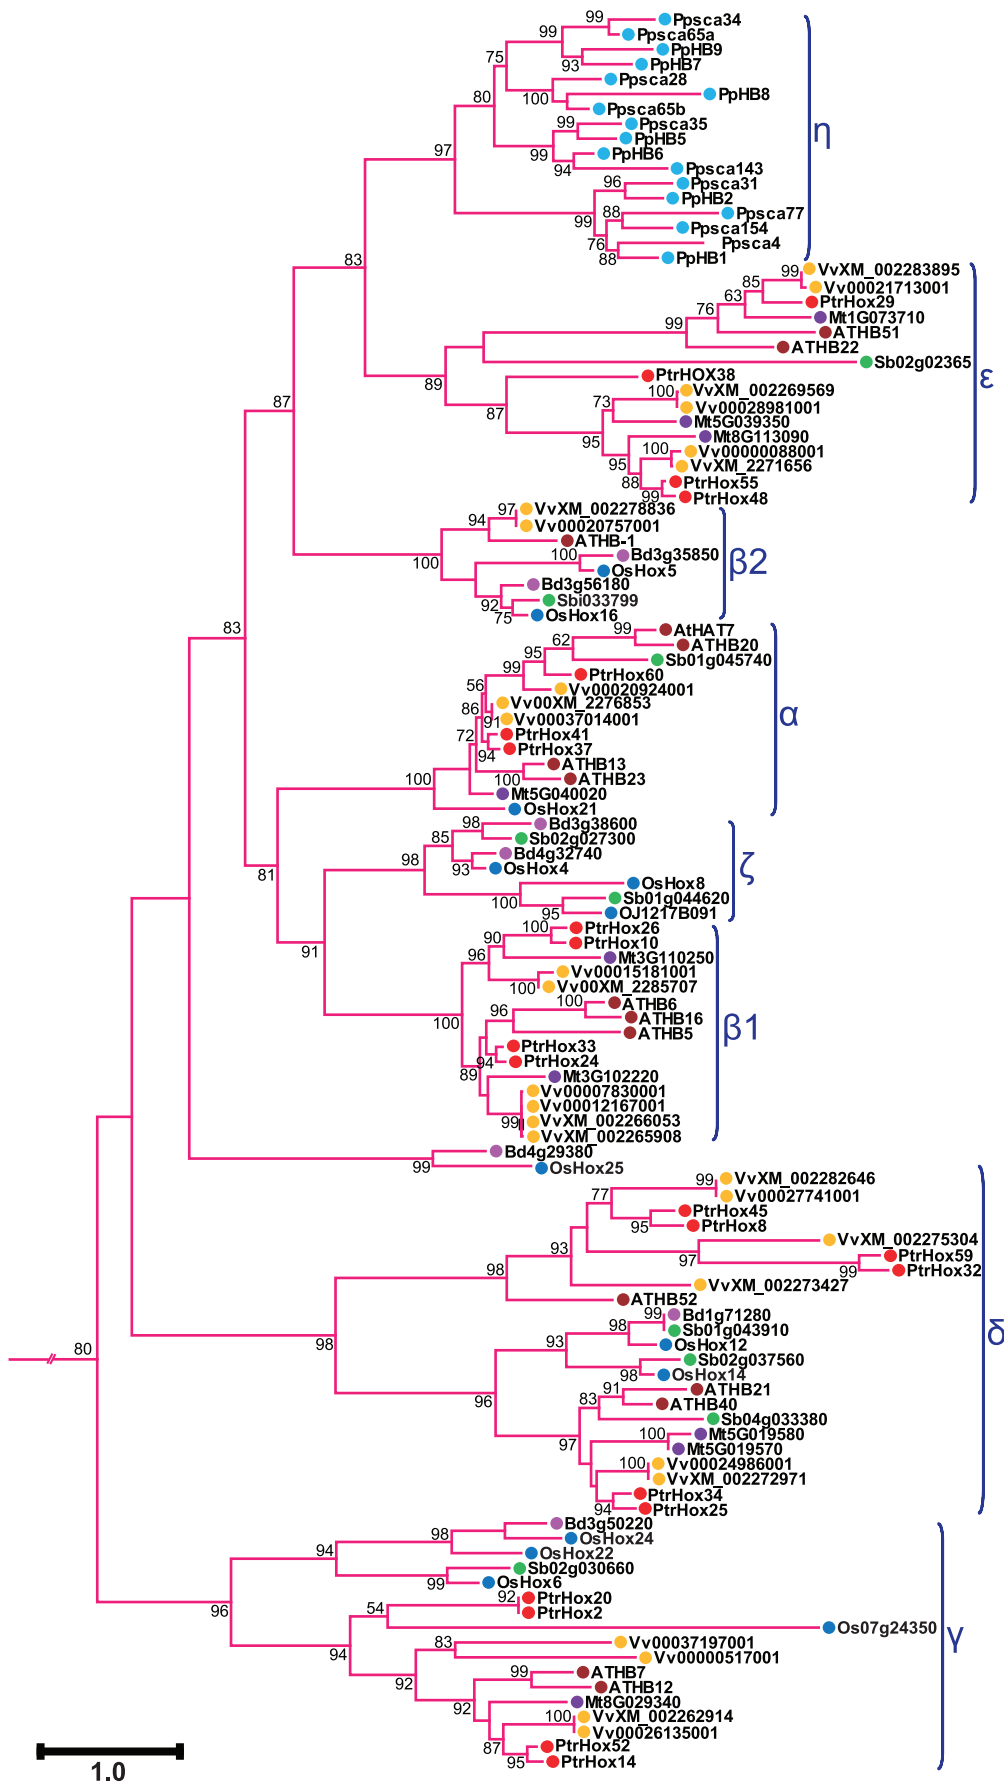

**Figure 2. Phylogenetic relationship of HD-ZIP I subfamily from eight plant species.** Expanded view of the phylogeny of HD-ZIP I members from Figure 1A. Numbers at each branch indicate bootstrap values and only values higher than 50% are shown. Scale bar corresponds to the estimated number of amino acid substitutions per site. Filled circles represent HD-ZIP proteins from different plant species with colors corresponding to plant taxa as indicated in Figure 1.  
doi:10.1371/journal.pone.0031149.g002

Duplicated genes may undergo divergent fates such as nonfunctionalization (loss of original functions), neofunctionalization (acquisition of novel functions), or subfunctionalization (partition of original functions) during subsequent evolution [72,73]. To explore whether Darwinian positive selection was involved in HD-ZIP gene divergence after duplication, the substitution rate ratios of nonsynonymous (dN or Ka) versus synonymous (dS or Ks) mutations (dN/dS or Ka/Ks) were calculated for 28 paralogous pairs. Generally, Ka/Ks = 1 means that the genes are pseudogenes with neutral selection, Ka/Ks < 1 indicates the functional constraint with negative or purifying selection of the genes, and Ka/Ks > 1 shows the accelerated evolution with positive selection. In this study, the Ka/Ks ratios from 24 segmental duplication pairs were less than 0.4 (Table 2). Only one duplication pair *PtrHox32/59* showed the Ka/Ks ratio larger than 0.4 (Table 2). Another paralogous gene pair *PtrHox2/20*, which were located out of segmental duplication blocks established in current *Populus* genome assembly (v2.1), had the Ka/Ks ratio slightly larger than 0.5. The relatively higher Ka/Ks ratio of *PtrHox2/20* suggests that they may have experienced relatively rapid evolution following duplication. Based on the Ka/Ks analyses, we could conclude that the *Populus* HD-ZIP gene family have mainly experienced strong purifying selection pressure with limited functional divergence occurred after segmental duplications. However, it still remains unknown whether the duplicated HD-ZIP genes correspond to genetic redundancy or have evolved divergent functions. Based on the divergence rate of  $9.1 \times 10^{-9}$  synonymous mutations per synonymous site per year as previously proposed for *Populus* [74], duplications of these 28 paralogous pairs was estimated to have occurred between 9.75 to 24.96 million year (MY) ago (Table 2).

### Gene structure and conserved motifs of *Populus* HD-ZIP genes

To gain further insights into the structural diversity of *Populus* HD-ZIP genes, we first constructed a separate phylogenetic tree exclusively using the full-length HD-ZIP protein sequences of *Populus*. *Populus* HD-ZIP proteins were also classified into four independent subfamilies as described above (Fig. 7A and Fig. 1A). We then compared the exon/intron organization in the coding sequences of each *Populus* HD-ZIP genes (Fig. 7B). Most closely related *Populus* HD-ZIP members within the same subfamilies shared very similar gene structure in terms of either intron numbers or exon lengths (Fig. 7B), i.e., all *Populus* HD-ZIP I gene had two or three introns, and HD-ZIP III possessed similar number of introns (as many as 17) in their coding sequences. Nonetheless, the gene structures in *Populus* HD-ZIP subfamilies II and IV appeared to be more variable and displayed the largest number of exon/intron structure variants, i.e., four *Populus* HD-ZIP II members had no introns in their coding regions but the other HD-ZIP II possessed one to three introns, and HD-ZIP IV members had a large variation from 7 to 11. We also investigated intron phases with respect to codons. Although the intron phases were remarkably well-conserved within the same subfamilies, there were striking distinctions in the arrangement of introns and intron phases among subfamilies of *Populus* HD-ZIP I–IV (Fig. S1). The conservation of intron phases within *Populus* HD-ZIP subfamilies and the striking dissimilarity between subfamilies may reciprocally

lend supports to the results from phylogenetic analysis and genome duplication.

We further examined the exon/intron organization of 25 paralogous pairs in *Populus* HD-ZIP genes to inquire the information of traceable intron gain or loss within these genes. Although 22 paralogous pairs showed conserved exon/intron structures in either intron numbers or gene lengths, three paralogous pairs (*PtrHox27/35*, *30/57*, and *47/54*) exhibited certain degrees of variations (Fig. 7B). These differences might be derived from the single intron loss or gain event during the structural evolution of HD-ZIP paralogues.

To further reveal the diversification of *Populus* HD-ZIP genes, we predicted the conserved motifs using MEME motif detection software and 20 distinct motifs were identified (Table S4). The details of the 20 putative motifs were referred in Table S4. Most of the closely related members in the phylogenetic tree shared common motif compositions with each other, suggesting functional similarities among the HD-ZIP proteins within the same subfamily (Fig. 7C). However, the biological significance of most of the putative motifs remains to be elucidated as they do not have homologues when searching against Pfam (<http://pfam.sanger.ac.uk/search>) and SMART (Simple Modular Architecture Research Tool) databases (<http://smart.embl-heidelberg.de>). As illustrated in the previous studies, most of the HD-ZIP proteins possessed HD and LZ domains at the N termini. In this study, motif 1 and 2 specifying HD helices and motif 7 corresponding to the ZIP subdomain were present in all of the HD-ZIP family members in *Populus*. Motif 3 corresponding to the START domain was present in the HD-ZIP III subfamily proteins. The CPSCE motif (motif 18) was found in the majority members in the HD-ZIP II subfamily with the exception of *PtrHox28*, 57, and 62. The conserved motifs 13 and 19 representing MEKHLA were found to be distributed in the C termini of HD-ZIP III proteins. Members in HD-ZIP I and II possessed significantly reduced number (3–4) of conserved motifs compared to those in HD-ZIP III and IV subfamily (8–10). Particularly, only three motifs (1, 2, and 7) were present in HD-ZIP I proteins, suggesting of high sequence divergence in the other regions of the proteins.

### Differential expression profile of *Populus* HD-ZIP genes

Publicly available Expressed Sequence Tags (ESTs) provide a useful tool to survey gene expression profiles by the means of Digital Northern. We first carried out a preliminary analysis of HD-ZIP gene expression under various growth conditions and across different tissues by counting the frequencies of ESTs in different *Populus* cDNA libraries (Fig. 8). Completely searching of the digital expression profiles from PopGenIE (<http://www.popgenie.org/>) [75] yield a total of 39 *Populus* HD-ZIP genes in the cDNA libraries. Not surprisingly and consistent with the usual transcriptional low-abundances of transcription factors [61], the frequencies of these ESTs were relatively low, and most of the HD-ZIPs were represented by only one single EST in the cDNA libraries. Nevertheless, these expression profiles demonstrated that most of the HD-ZIPs have a broad expression pattern across different tissues.

To gain more insights into the expression profiles of HD-ZIP genes, we then re-analyzed the previously published microarray data in *Populus*. We first investigated the global expression profiles



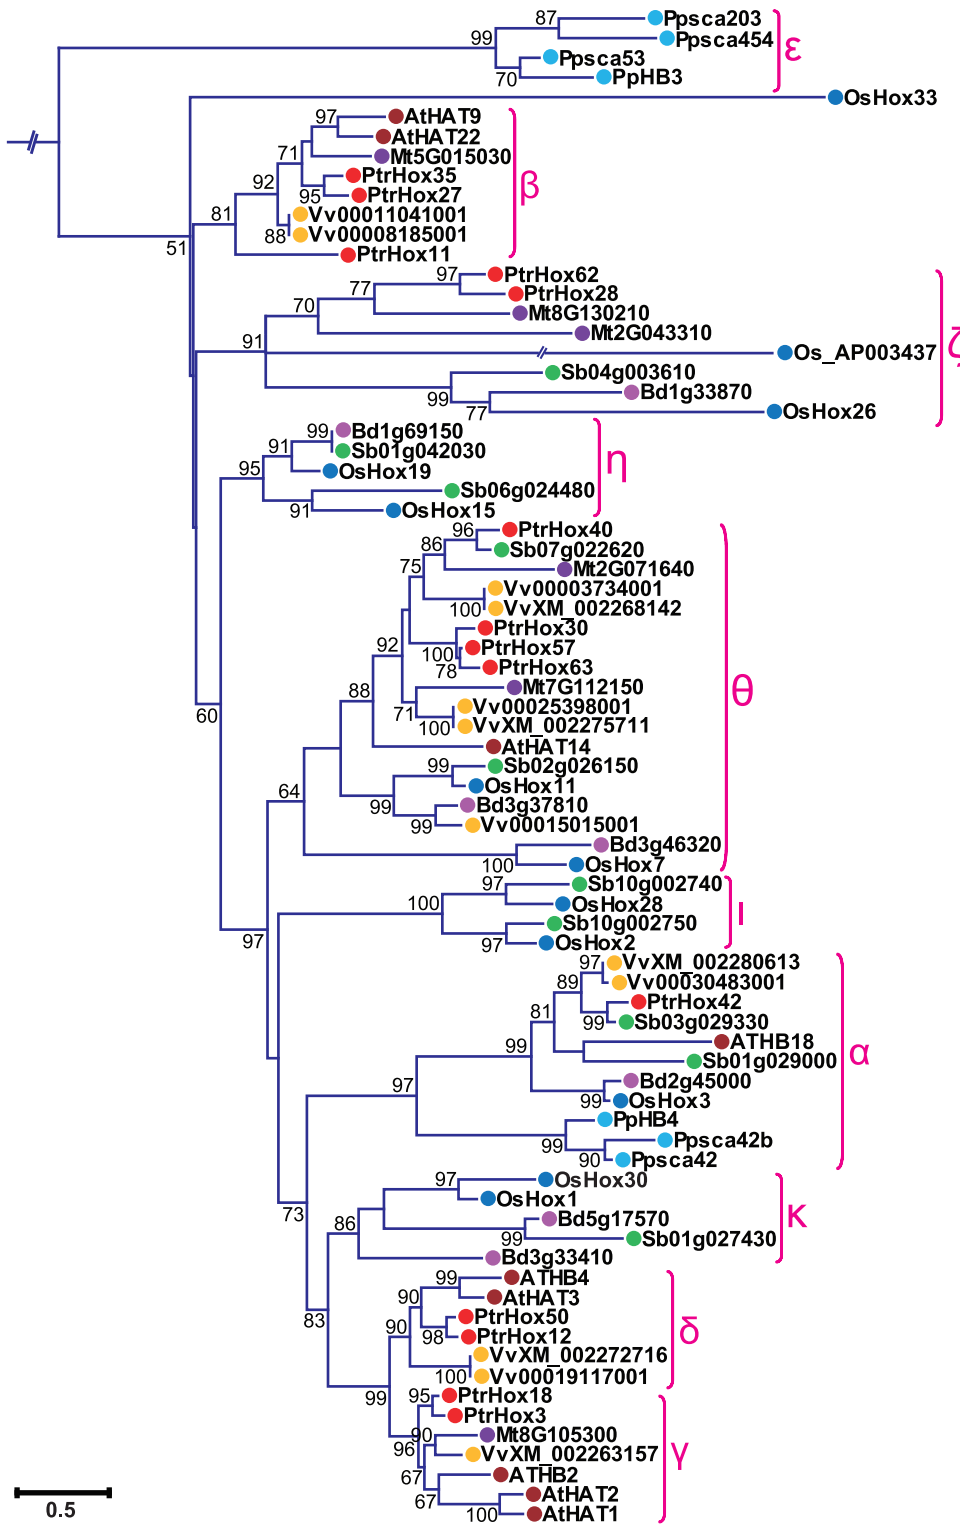

**Figure 3. Phylogenetic relationship of HD-ZIP II subfamily from eight plant species.** Expanded view of the phylogeny of HD-ZIP II members from Figure 1A. The numbers at the nodes represent the bootstrap values (>50%) from 100 replicates. Scale bar indicates the estimated number of amino acid substitutions per site. Filled circles represent HD-ZIP proteins from different plant species with colors corresponding to plant taxa as indicated in Figure 1.  
doi:10.1371/journal.pone.0031149.g003

of HD-ZIP genes by examining an Affymetrix (GSE13990) [61] and a Nimblegen (GSE13043) [76] microarray data from Gene Expression Omnibus [77]. Although these two microarray dataset

were performed in different platforms, they largely represented the *Populus* HD-ZIP genes presenting in this study. Fifty-four HD-ZIP genes were included on both GSE13990 and GSE13043, and only

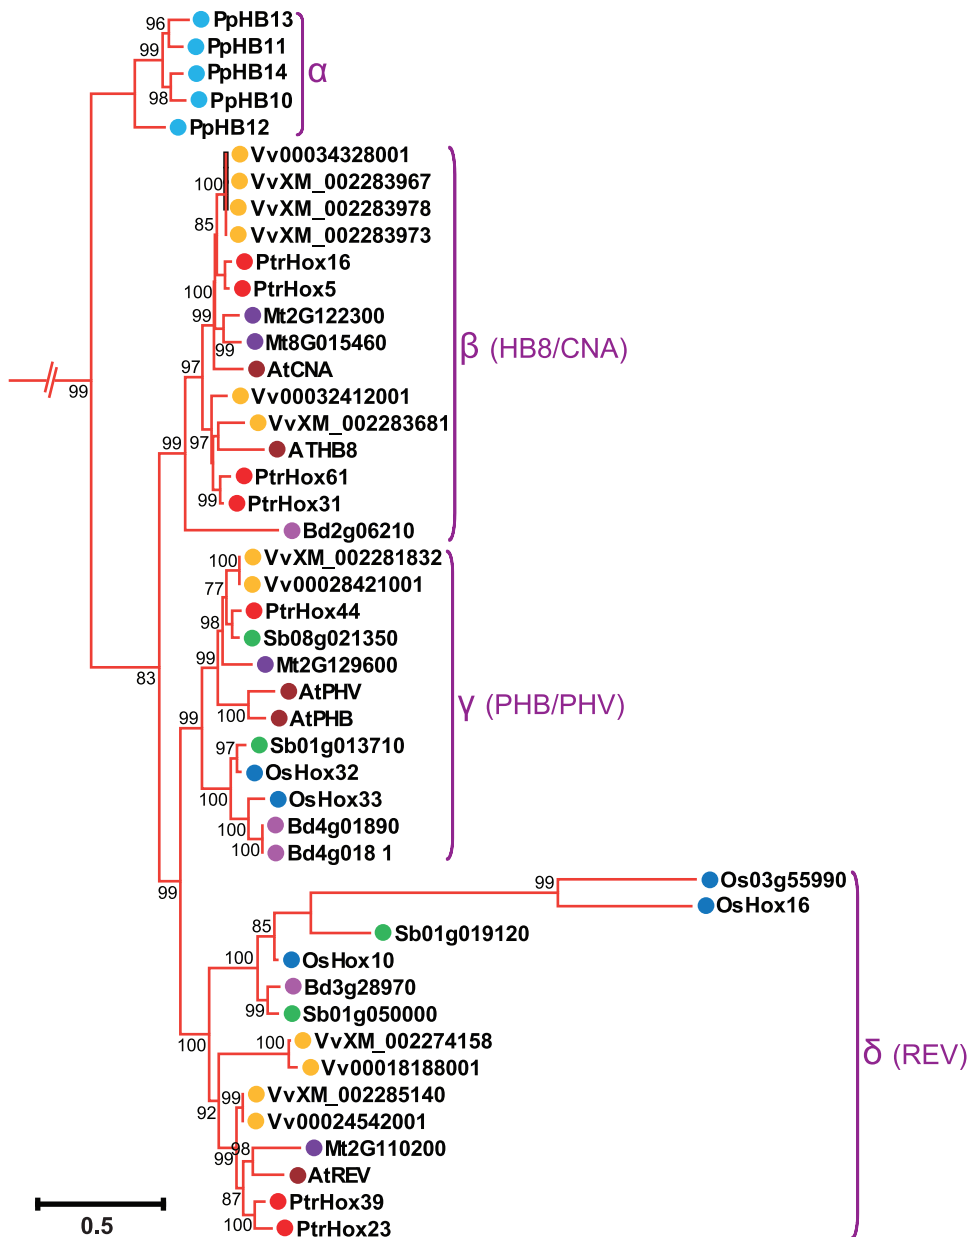

**Figure 4. Phylogenetic relationship of HD-ZIP III subfamily from eight plant species.** Enlarged view of the phylogeny of HD-ZIP III members from Figure 1A. Numbers at each branch indicate bootstrap values and only values higher than 50% are shown. Scale bar corresponds to the estimated number of amino acid substitutions per site. Filled circles represent HD-ZIP proteins from different plant species. Colors correspond to plant taxa as indicated in Figure 1.

doi:10.1371/journal.pone.0031149.g004

three additional genes (*PtrHox37*, *53*, and *55*) were solely present on GSE13043 (Table S5). The majority of HD-ZIP genes showed a distinct tissue-specific expression pattern (Fig. 9). Of these 57 HD-ZIPs examined, ten genes presented in both microarray datasets had high transcript accumulation in the differentiating xylems and basal stems (internode 9) undergoing secondary growth. Phylogenetic analysis further showed that eight genes (*PtrHox5*, *7*, *16*, *23*, *31*, *39*, *44*, and *61*) in this subset fell into HD-ZIP III subfamily and the other two genes (*PtrHox11* and *35*) into HD-ZIP II (Fig. 3). In *Arabidopsis* and rice, HD-Zip III genes have been functionally well-characterized as developmental regulators of the apical embryo patterning, shoot meristem formation and vascular differentiation [29,59]. Among them, two closely related

members, *ATHB8* and *CNA/ATHB15/ICU4*, have been functionally characterized to regulate vascular patterning and procambial development [30,32,36]. In comparison, the eight *Populus* genes from HD-ZIP III subfamily identified in the present study showed preferentially high expression levels in secondary xylem, indicative of their putative roles in the regulation of secondary growth in *Populus*. Recently, two orthologous genes of *REV* (*PRE/PtrHox23*) and *CNA/ATHB15/ICU4* (*PCN/PtrHox5*) were functionally characterized in *Populus* respectively, with specific roles in the secondary cell wall formation and cell fate determination [54,55]. However, the functional roles of the rest HD-ZIP III genes in *Populus* remain to be elucidated. Besides the large proportion of HD-ZIP genes were highly transcribed in the

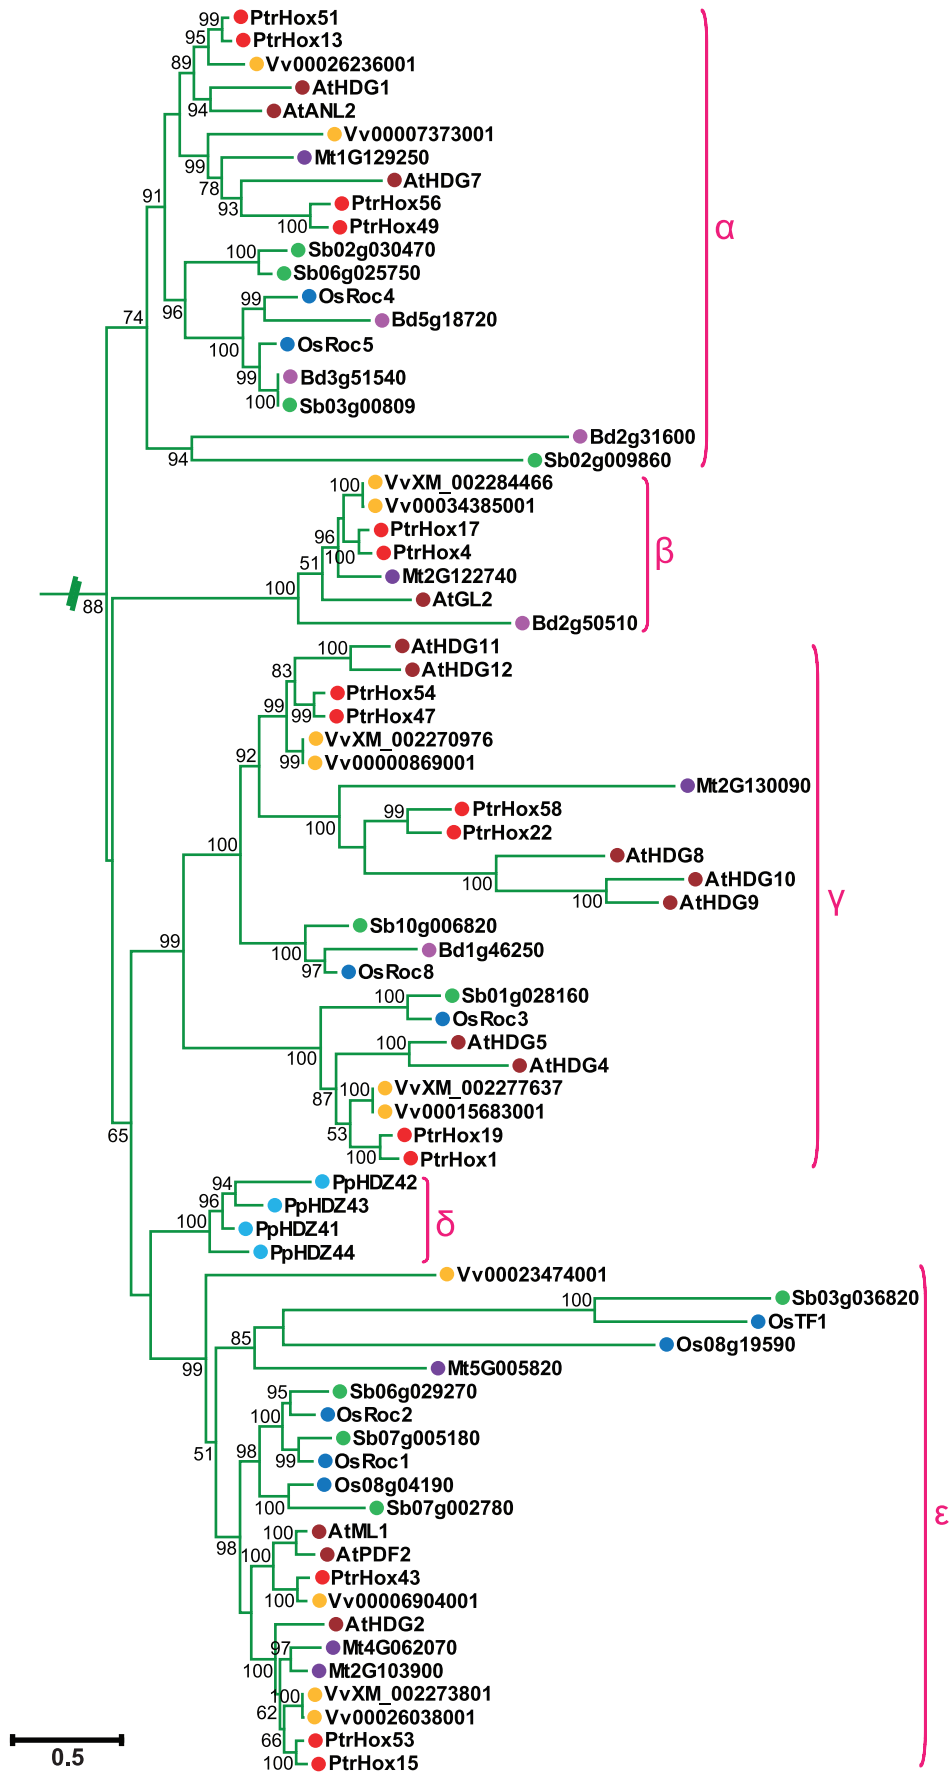

**Figure 5. Phylogenetic relationship of HD-ZIP IV subfamily from eight plant species.** Enlarged view of the phylogeny of HD-ZIP IV members from Figure 1A. The numbers at the nodes represent the bootstrap values (>50%) from 100 replicates. Scale bar indicates the estimated number of amino acid substitutions per site. Filled circles represent HD-ZIP proteins from different plant species. Colors correspond to plant taxa as indicated in Figure 1.  
doi:10.1371/journal.pone.0031149.g005

secondary growth tissues, another 11 genes comprising of four HD-ZIP I genes (*PtrHox46*, *47*, *55*, and *60*), three HD-ZIP II genes (*PtrHox28*, *42*, and *62*) and four HD-ZIP IV genes (*PtrHox1*, *19*, *53*, and *56*) showed comparatively higher transcript abundances in tissues undergoing primary growth in the upper stem (internode 2 to internode 4) (Fig. 9B). How these *Populus* HD-ZIPs perform their functional roles in the primary growth and secondary cell wall formation remains to be elucidated and further functional analyses will be required to understand their biological roles in *Populus*.

*Populus* HD-ZIP may also involve in other biological processes, such as male and female catkin differentiation, root specification and photosynthetic response. Seventeen HD-ZIP genes were preferentially expressed in male and female catkins (Fig. 9A), of which, 11 genes had the highest transcript abundances in male

catkins (MC), and six genes in female catkins (FC). Another subset of 11 HD-ZIP genes, comprising of five HD-ZIP I (*PtrHox8*, *14*, *26*, *33*, and *34*), four HD-ZIP II (*PtrHox11*, *18*, *27*, and *35*), and two HD-ZIP III genes (*PtrHox7* and *44*) displayed biased expression in root tissue. In addition, four HD-ZIP genes (*PtrHox2*, *18*, *45*, and *47*) were differentially expressed in dark-grown etiolated seedlings (DG) and continuous light grown seedlings (CL), suggesting their putative roles in photoperiodic regulation.

To further investigate the responses of *Populus* HD-ZIP genes to abiotic stresses, we also examined their expression patterns under abiotic stresses including low nitrogen, mechanical wounding, drought, as well as Methyl Jasmonate (MeJ) treatment. Gene expression of most HD-ZIP genes were induced or suppressed under these abiotic stresses (Fig. 10). *PtrHox14* in HD-ZIP I subfamily was commonly up-regulated under both nitrogen

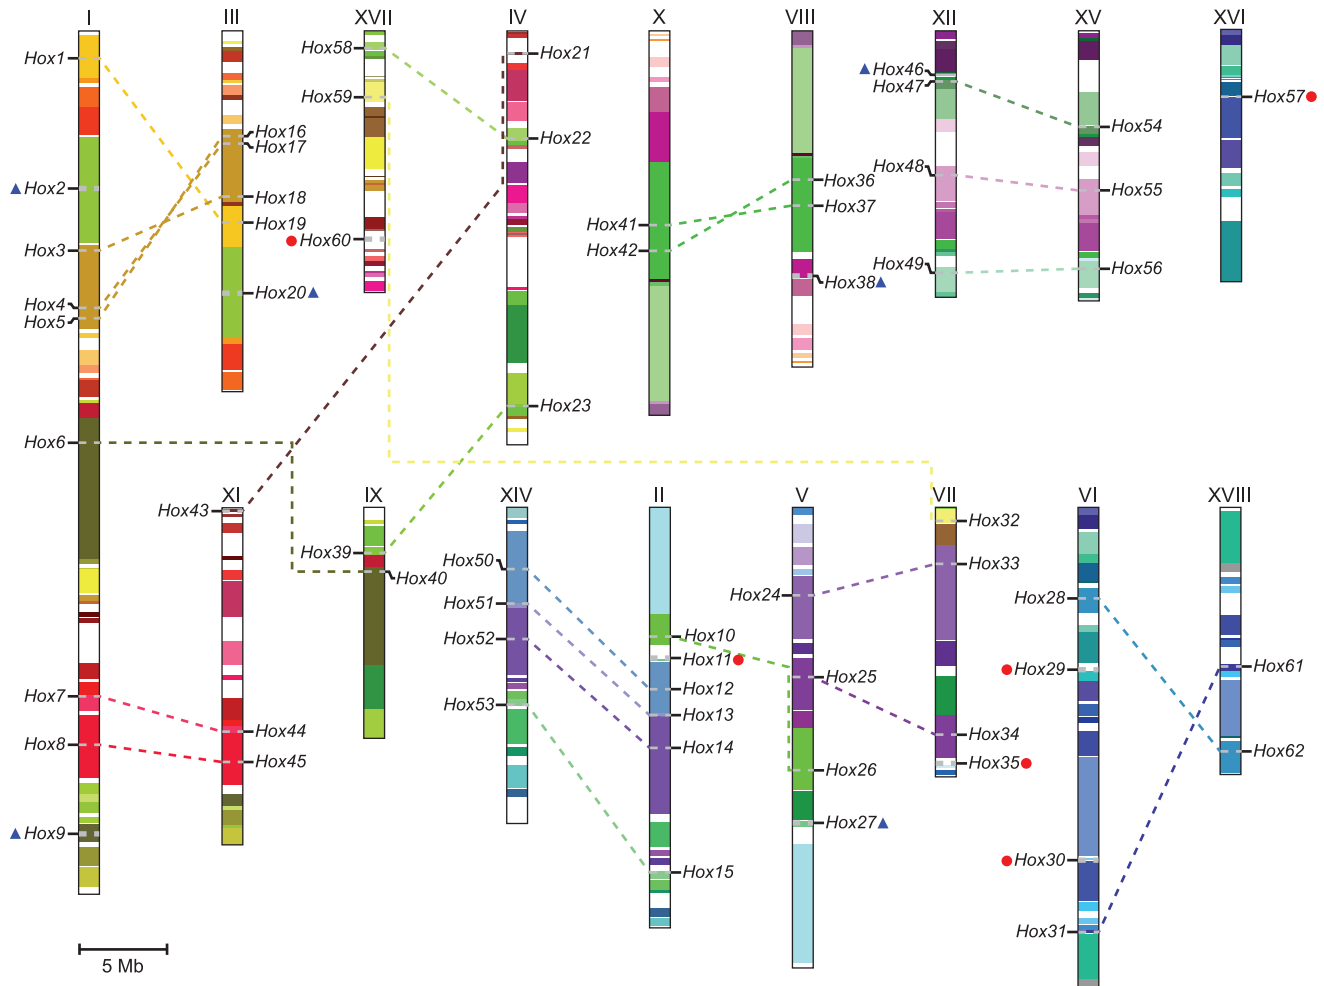

**Figure 6. Chromosomal locations and segmental duplication events of *Populus* HD-ZIP genes.** The schematic diagram of genome-wide chromosome organization arisen from the salicoid genome duplication event in *Populus* was accomplished based on duplication coordinates from the *Populus* genome assembly v2.1. Segmental duplicated blocks are indicated with the same colors. The duplicated paralogous pairs of HD-ZIP are connected with dotted lines. Blue triangles indicate HD-ZIPs located on duplicated segments with the corresponding member lost. Red circles represent HD-ZIPs located out of any duplicated regions. Scale represents a 5 Mb chromosomal distance.  
doi:10.1371/journal.pone.0031149.g006

**Table 2.** The Ka/Ks ratios and estimated divergence time for paralogous HD-ZIP proteins.

| Paralogous pairs  | Ka    | Ks    | Ka/Ks | Duplication date (MY) |
|-------------------|-------|-------|-------|-----------------------|
| PtrHox1–PtrHox19  | 0.054 | 0.217 | 0.248 | 11.91                 |
| PtrHox10–PtrHox26 | 0.074 | 0.314 | 0.235 | 17.23                 |
| PtrHox12–PtrHox50 | 0.046 | 0.207 | 0.221 | 11.39                 |
| PtrHox13–PtrHox51 | 0.027 | 0.275 | 0.099 | 15.12                 |
| PtrHox14–PtrHox52 | 0.049 | 0.308 | 0.158 | 16.91                 |
| PtrHox15–PtrHox53 | 0.029 | 0.284 | 0.102 | 15.62                 |
| PtrHox2–PtrHox20  | 0.196 | 0.360 | 0.543 | 19.79                 |
| PtrHox21–PtrHox43 | 0.033 | 0.244 | 0.135 | 13.39                 |
| PtrHox22–PtrHox58 | 0.116 | 0.296 | 0.393 | 16.27                 |
| PtrHox23–PtrHox39 | 0.047 | 0.212 | 0.219 | 11.64                 |
| PtrHox24–PtrHox33 | 0.042 | 0.278 | 0.150 | 15.25                 |
| PtrHox25–PtrHox34 | 0.083 | 0.219 | 0.379 | 12.03                 |
| PtrHox27–PtrHox35 | 0.122 | 0.399 | 0.306 | 21.90                 |
| PtrHox28–PtrHox62 | 0.144 | 0.454 | 0.316 | 24.96                 |
| PtrHox3–PtrHox18  | 0.040 | 0.367 | 0.110 | 20.15                 |
| PtrHox30–PtrHox57 | 0.060 | 0.314 | 0.190 | 17.23                 |
| PtrHox31–PtrHox61 | 0.020 | 0.219 | 0.092 | 12.04                 |
| PtrHox32–PtrHox59 | 0.097 | 0.197 | 0.492 | 10.83                 |
| PtrHox36–PtrHox42 | 0.054 | 0.198 | 0.271 | 10.85                 |
| PtrHox37–PtrHox41 | 0.050 | 0.313 | 0.158 | 17.20                 |
| PtrHox4–PtrHox17  | 0.040 | 0.191 | 0.208 | 10.50                 |
| PtrHox47–PtrHox54 | 0.031 | 0.223 | 0.141 | 12.27                 |
| PtrHox48–PtrHox55 | 0.042 | 0.342 | 0.122 | 18.78                 |
| PtrHox49–PtrHox56 | 0.063 | 0.178 | 0.357 | 9.75                  |
| PtrHox5–PtrHox16  | 0.017 | 0.224 | 0.076 | 12.32                 |
| PtrHox6–PtrHox40  | 0.081 | 0.273 | 0.296 | 15.01                 |
| PtrHox7–PtrHox44  | 0.025 | 0.190 | 0.131 | 10.43                 |
| PtrHox8–PtrHox45  | 0.119 | 0.369 | 0.322 | 20.27                 |

doi:10.1371/journal.pone.0031149.t002

deprivation and drought stress treatments in two different *Populus* genotypes. However, four genes (*PtrHox11*, *22*, *54*, and *59*) were down-regulated under nitrogen deprivation stress with four-week old young leaves (YL), with four-week and eight-week old expanded leaves (EL) in both genotypes 1979 and 3200 (Fig. 10A).

The responses of HD-ZIP genes to nitrogen deficit stress differ between the two *Populus* genotypes examined. For instance, three genes namely *PtrHox1*, *PtrHox8* and *PtrHox12* were significantly up-regulated at four-week old leaves in genotype 1979, whereas no distinctive expression patterns were observed in genotype 3200 (Fig. 10A). Mechanical wounding stress caused commonly up-regulation of two genes (*PtrHox17* and *23*) and down-regulation of *PtrHox27* at 90 h and/or one week after wounding in young leaves, expanding leaves and root tips. In addition, a subset of genes showed up- or down-regulation only under mechanical wounding stress with young leaves. Similarly, transcripts of a considerable proportion of genes were either enhanced or repressed following mechanical wounding in expanded leaves or root tips, respectively (Fig. 10A). In response to MeJ feeding in cell culture, two genes (*PtrHox18* and *45*) were shown to be significantly up-regulated, whereas the transcripts of seven genes (*PtrHox6*, *30*, *31*, *35*, *48*, *56*, and *61*) showed down-regulation (Fig. 10A). In responses to

drought stress, eight genes including three genes from HD-ZIP I (*PtrHox33*, *45*, and *54*), one gene from HD-ZIP II (*PtrHox6*) as well as four genes in HD-ZIP IV subfamilies (*PtrHox15*, *47*, *51*, and *58*) were shown to be down-regulated in both genotypes under all drought conditions tested, which included an early response (EAR) to water deficit by 36 hours and long-term (10-day) response to mild stress (LMI) and moderate stress (LMO) (Fig. 10B).

The high proportion of segmental duplication of HD-ZIP genes and the preferential retention of duplicates raises the question about their functional redundancy. Duplicate genes may have different evolutionary fates: nonfunctionalization, neofunctionalization, or subfunctionalization, which may be indicated with divergence in their expression patterns. Of the 28 paralogous pairs of HD-ZIP genes, five genes do not have corresponding probe sets in the microarray datasets and thus were excluded in further analysis. Twenty-one pairs out of the remaining 23 paralogous pairs were located onto duplicated blocks. Five paralogous pairs (*PtrHox5/16*, *PtrHox7/44*, *PtrHox13/51*, *PtrHox23/39*, and *PtrHox31/61*) derived from segmental duplications shared almost identical expression patterns with respect to different tissues and various stresses. In contrast, the expression patterns of three paralogous pairs (*PtrHox8/45*, *PtrHox21/43*, and *PtrHox22/58*) diversified significantly, indicating substantial neofunctionalization during subsequent evolution processes. For instance, *PtrHox8* gene showed the highest transcript abundances in dark-grown etiolated seedlings and roots, and the least expressions in male and female catkins, whereas its duplicated counterpart *PtrHox45* was preferentially expressed in female catkins and dark-grown etiolated seedlings. Although the expression patterns of the rest of duplicate genes were partially redundant, distinct pattern shifts can be discerned with respect to the microarray datasets investigated, suggests that they might have undergone subfunctionalization. These findings indicated that expression profiles of HD-ZIPs have diverged substantially after segmental duplications, thus we are attempting to speculate that the HD-ZIP genes in *Populus* are likewise to have been retained by substantial subfunctionalization during the evolutionary processes.

#### Examination of HD-ZIP gene expressions by qRT-PCR

To verify the expression profiles of *Populus* HD-ZIP genes obtained by the microarray analysis, qRT-PCR analysis was performed on six different tissues for 12 selected HD-ZIP genes, including four paralogous pairs (*PtrHox5/16*, *PtrHox7/44*, *PtrHox23/39*, and *PtrHox31/61*) that were presumably highly expressed in developing xylem based on microarray analysis. Sequence-specific primers were used to distinguish the amplicons of the paralogous pairs. The gene expression pattern detected by qRT-PCR was roughly in consistency with the microarray analysis and had very distinct tissue-specific expression pattern (Fig. 11). A subset of ten genes were highly expressed in differentiating xylem and weakly expressed in cortex and leaves. Among them, *PtrHox5* (*PCN*) and *PtrHox23* (*PRE*) have been recently functionally characterized [54,55].

Paralogous pairs with divergent expression patterns could represent the events of sub- or neo-functionalization that may lead to evolutionary diversifications of gene functionalities. To test this hypothesis, we first investigated the divergence of gene expression in the duplicated *PtrHox* gene pairs to reveal the role of segmental duplications. Four paralogous gene pairs we examined showed similar tissue-specific expression patterns. *PtrHox5/16* and *PtrHox7/44* were most abundantly expressed in differentiating xylems, followed by roots and shoot tips, and were least expressed in cortex and leaves tissues. *PtrHox31/PtrHox61* genes showed the highest transcript abundances in both differentiating xylems and

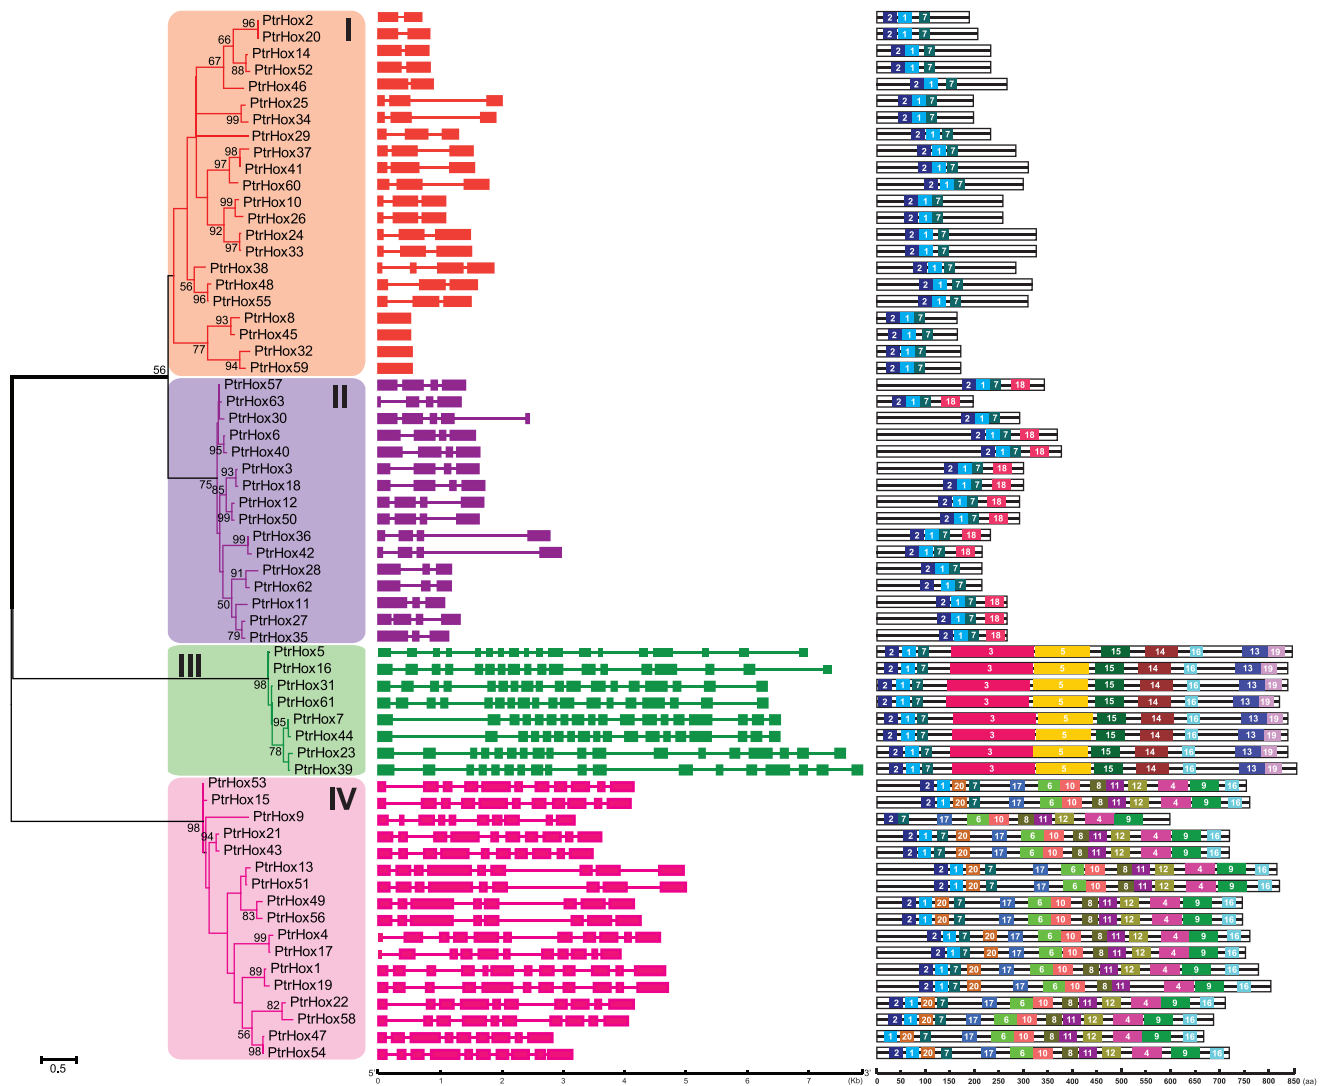

**Figure 7. Phylogenetic relationship, gene structure and motif compositions of *Populus* HD-ZIP genes.** **A.** The phylogenetic tree was constructed using full-length protein sequences by the maximum likelihood method with 100 bootstrap replicates. The percentage bootstrap scores higher than 50% are indicated on the nodes. The four major phylogenetic subfamilies designated as I to IV are marked with different color backgrounds. **B.** Exon/intron structures of HD-ZIP genes from *Populus*. Exons and introns are represented by green boxes and black lines, respectively. The sizes of exons and introns are proportional to their sequence lengths. **C.** Schematic representation of the conserved motifs in the HD-ZIP proteins from *Populus* elucidated by MEME. Each motif is represented by a number in the colored box. The details of individual motif are provided in Table S4.  
doi:10.1371/journal.pone.0031149.g007

roots with much lower expressions in cortex and leaf tissues. *PtrHox23/PtrHox39* genes were expressed much higher in differentiating xylems and roots than the other tissues. Meanwhile,  $Ka/Ks$  ratios of these four paralogous pairs were relatively low with ratios 0.076 for *PtrHox5/16*, 0.092 for *PtrHox31/61*, 0.131 for *PtrHox7/44* and 0.219 for *PtrHox23/39* (Table 2). This tissue-specific expression pattern, combined with the  $Ka/Ks$  analysis (Table 2), suggests that the functions of *Populus* HD-ZIP III genes may have been retained with a relatively low divergence.

Besides the tissue-specific gene expression pattern, the response of four HD-ZIP genes to drought and salinity stresses was also analyzed by qRT-PCR and the results were broadly consistent with those of the microarray data (Fig. 12 and Fig. 10). Response of *PtrHox18* gene was significantly decreased in leaves at different time-points following dehydration stress, while no obvious differential expressions were observed in a 24-hour time-course

following salinity stress treatment. *PtrHox30* gene was significantly induced in the first three hours following dehydration stress and then decreased gradually at four time points thereafter, whereas the expression of *PtrHox30* decreased significantly following NaCl treatment with the lowest expression at nine hours after treatment. Similar to microarray analysis, the transcript abundances of paralogous pair *PtrHox14/52*, orthologous to *Arabidopsis ATHB7* involving in ABA-related and abiotic stress responses [13,15,16], were both significantly induced in *Populus* leaves 24 hours after dehydration stress and both showed the highest accumulation in leaves nine hours after the treatment of high salinity stress.

Taken all of the evidences together, the expression patterns of *Populus* HD-ZIP genes detected by qRT-PCR are generally consistent with microarray analyses nonetheless two different *Populus* genotypes (*Populus deltoides* and *Populus × euramericana cv*) were used.



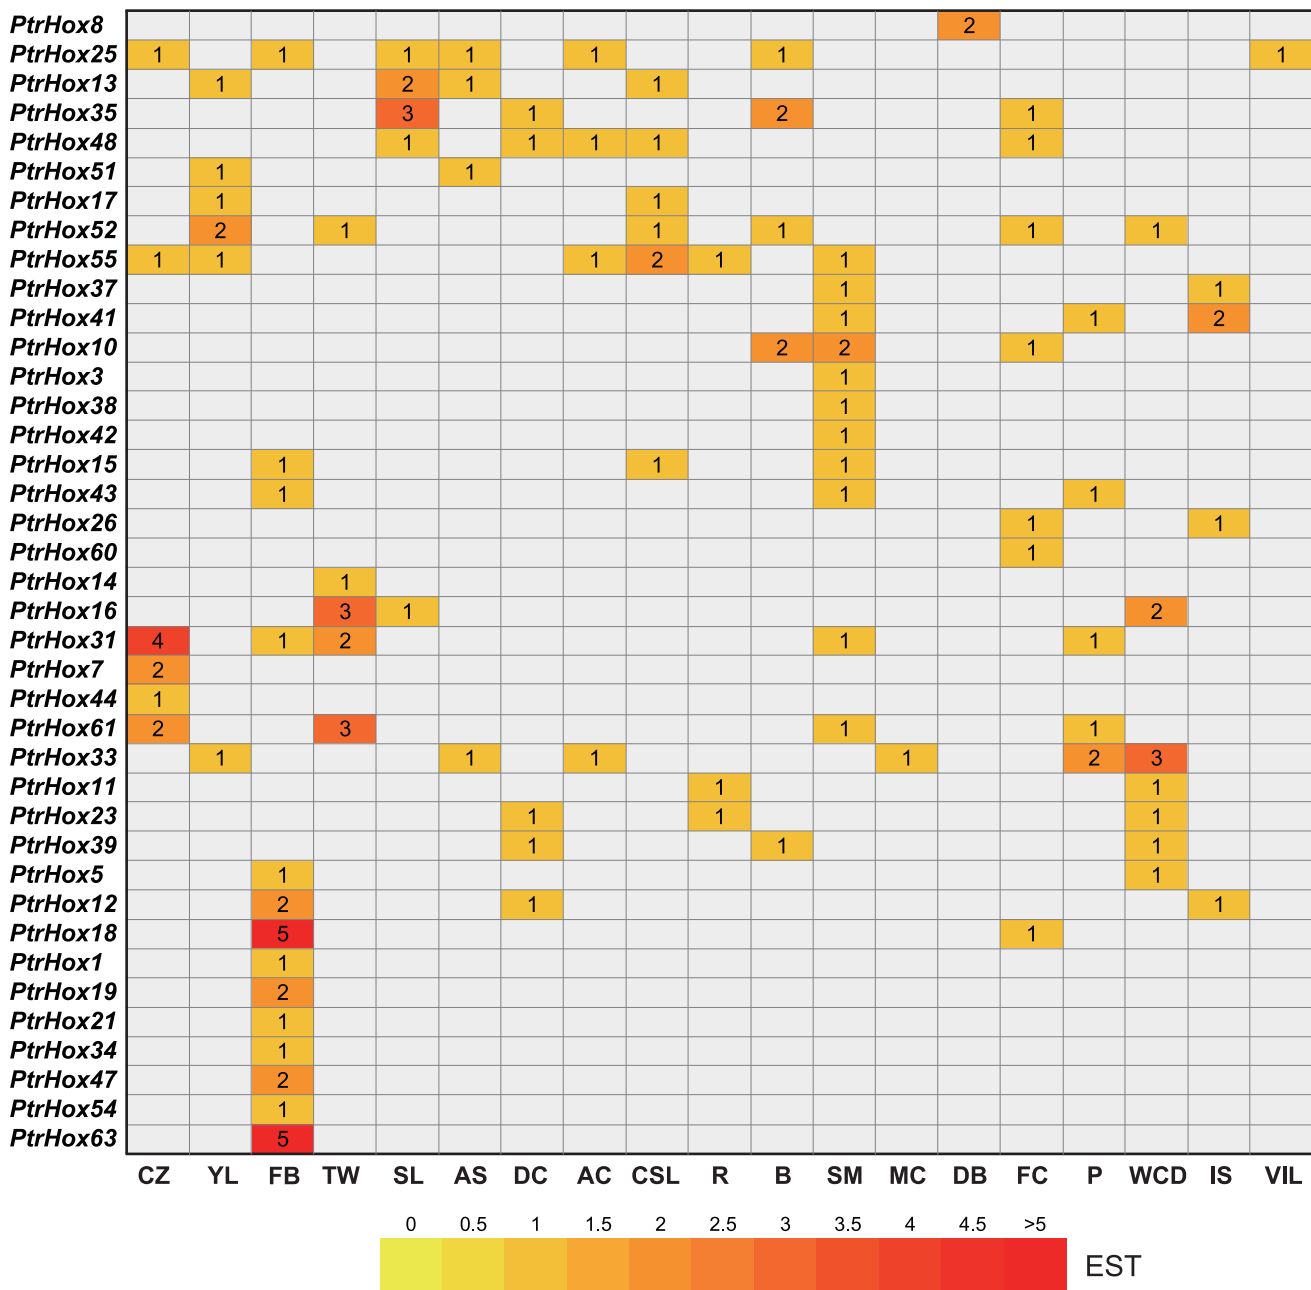

**Figure 8. In silico EST analysis of Populus HD-ZIP genes.** EST frequency for each gene was calculated by evaluating its EST representation among 19 cDNA libraries available at PopGenIE (<http://www.popgenie.org/>) [75]. The heatmap was visualized using Heatmapper Plus tool by counting the corresponding ESTs for particular gene in the database. Color bar at bottom represents the frequencies of EST counts. CZ: cambial zone, YL: young leaves, FB: flower buds, TW: tension wood, SL: senescing leaves, AS: apical shoot, DC: dormant cambium, AC: active cambium, CSL: cold stressed leaves, R: roots, B: bark, SM: shoot meristem, MC: male catkins, DB: dormant buds, FC: female catkins, P: petioles, WCD: wood cell death, IS: imbibed seeds, VIS: Virus/fungus-infected leaves. doi:10.1371/journal.pone.0031149.g008

**Materials and Methods**

**Ethics Statement**

No specific permits were required for the described field studies. No specific permissions were required for these locations and activities. The location is not privately-owned or protected in any way and the field studies did not involve endangered or protected species.

**Database search and sequence retrieval**

Sequences of *Arabidopsis* HD-ZIP proteins were obtained from the *Arabidopsis* Information Resource (TAIR, <http://www.arabidopsis.org/>, release 10.0). Rice HD-ZIP gene sequences were downloaded from rice genome annotation database (<http://rice.plantbiology.msu.edu/>, release 5.0). Sequences of *Populus*, *Medicago*, *Sorghum*, *Brachypodium*, *Vitis*, and *Physcomitrella patens* were downloaded from Phytozome (<http://www.phytozome.net/>). Lo-

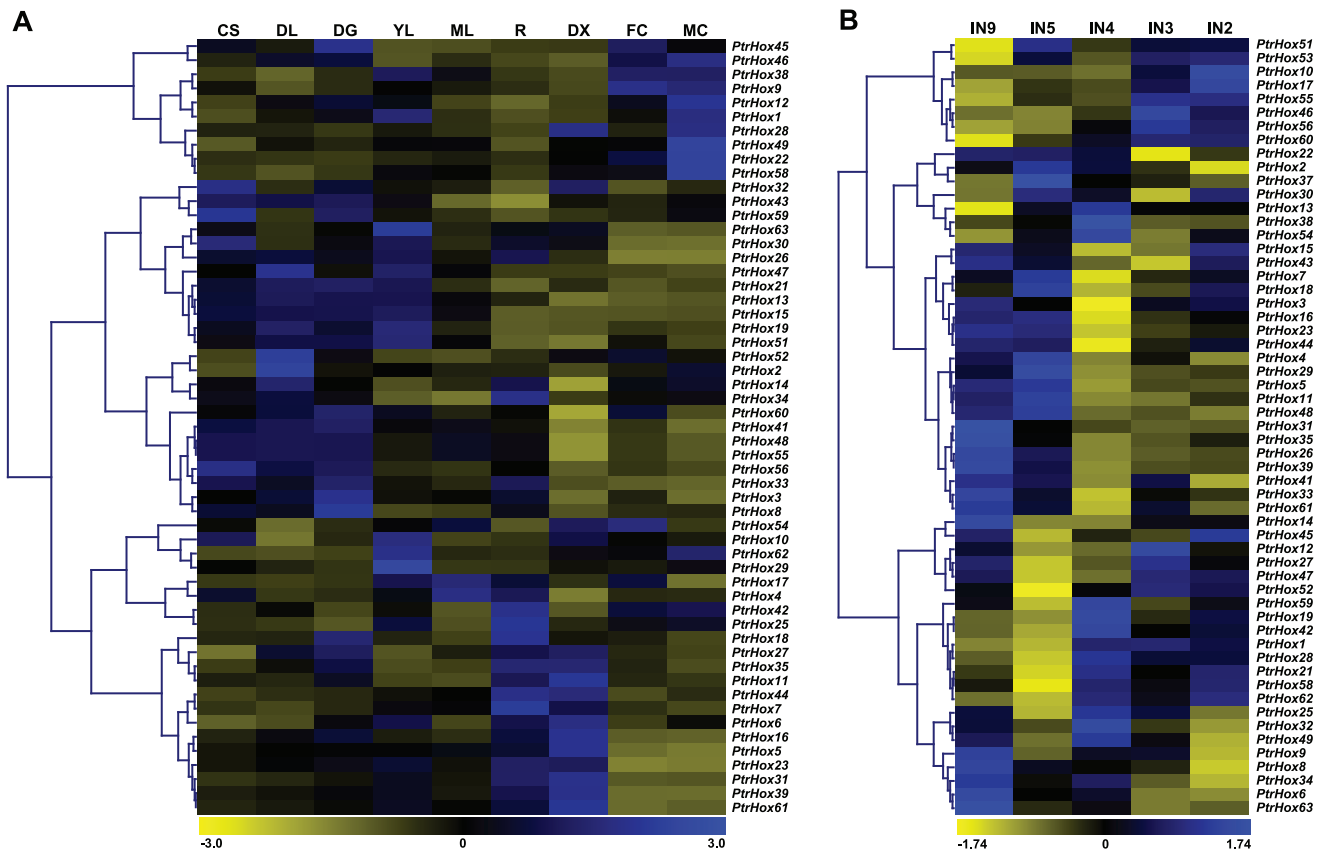

**Figure 9. Expression profiles of *Populus* HD-ZIP genes across different tissues.** Background corrected expression intensities were log-transformed and visualized as heatmaps (see Materials and Methods). **A.** Heatmap showing hierarchical clustering of 54 *PtrHox* genes across various tissues analyzed. The Affymetrix microarray data were obtained from NCBI Gene Expression Omnibus (GEO) database under the series accession number GSE13990. CL, continuous light-grown seedling; DL, etiolated dark-grown seedling transferred to light for 3 h; DS, dark-grown seedlings; YL, young leaf; ML, mature leaf; R, root; DX, differentiating xylem; FC, female catkins; MC, male catkins. **B.** Heatmap showing hierarchical clustering of 57 *PtrHox* genes at different stem development/growth stages. The NimbleGen microarray data were obtained from NCBI GEO database under the series accession number GSE17230. IN2-IN9, stem internodes 2 to stem internodes 9. Color scale represents log<sub>2</sub> expression values, yellow represents low level and blue indicates high level of transcript abundances.

doi:10.1371/journal.pone.0031149.g009

cal blast was performed using *Arabidopsis* HD-ZIP protein as queries for the identification of the HD-ZIP genes from *Populus* and seven other plant species. For the misannotated genes, manual reannotation was performed using online web server FGENESH (<http://linux1.softberry.com/berry.phtml>). Then, all the sequences were further manually analyzed to confirm the presence of HD and LZ domain using InterProScan program (<http://www.ebi.ac.uk/Tools/InterProScan/>).

### Phylogenetic analysis

Multiple sequence alignments of the full-length protein sequences were performed by MAFFT (v6.843b) program. The maximum likelihood (ML) phylogenetic tree was constructed using PhyML (v3.0) under the Jones-Taylor-Thornton (JTT) amino acid substitution model, with 100 replicates of bootstrap analysis, estimated proportion of invariable sites, four rate categories, estimated gamma distribution parameter, and optimized starting BIONJ tree [78,79]. The phylogenetic trees were displayed using MEGA (v5.0) with 50% threshold of branch value [80].

### Chromosomal location and gene duplication

Genes were mapped on chromosomes by identifying their chromosomal position provided in the Phytozome database.

Identification of segmental duplications resulting from salicoid genome-wide duplications was accomplished based on duplication coordinates from the *Populus* genome assembly v2.1. Blocks in the same colors represent the homeologous chromosomal segments.

To search for retrotransposons, BioMart online server at Phytozome website (<http://www.phytozome.net/>) was used to extract the flanking genomic sequences of 10-kb upstream and downstream of each HD-ZIP gene. Sequences were subjected to BLASTX searches against the GenBank non-redundant protein database at National Center for Biotechnology Information (NCBI) using E-value cutoff set to  $1e^{-10}$ . The output file was manually inspected for the presence of transposable elements including retrotransposons (LTR or non-LTR-related) and transposon (MULE, CACTA, hAT, and Heliton).

### Calculation of Ka/Ks Values

Amino acid sequences from segmentally duplicated pairs were aligned first by Clustal X v1.83 and the aligned sequences were subsequently transferred into original cDNA sequences using the PAL2NAL program (<http://www.bork.embl.de/pal2nal/>) [81], which uses the CODEML program of PAML [82] to estimate synonymous (Ks) and nonsynonymous (Ka) substitution rates. Divergence time (T) was calculated using a synonymous mutation

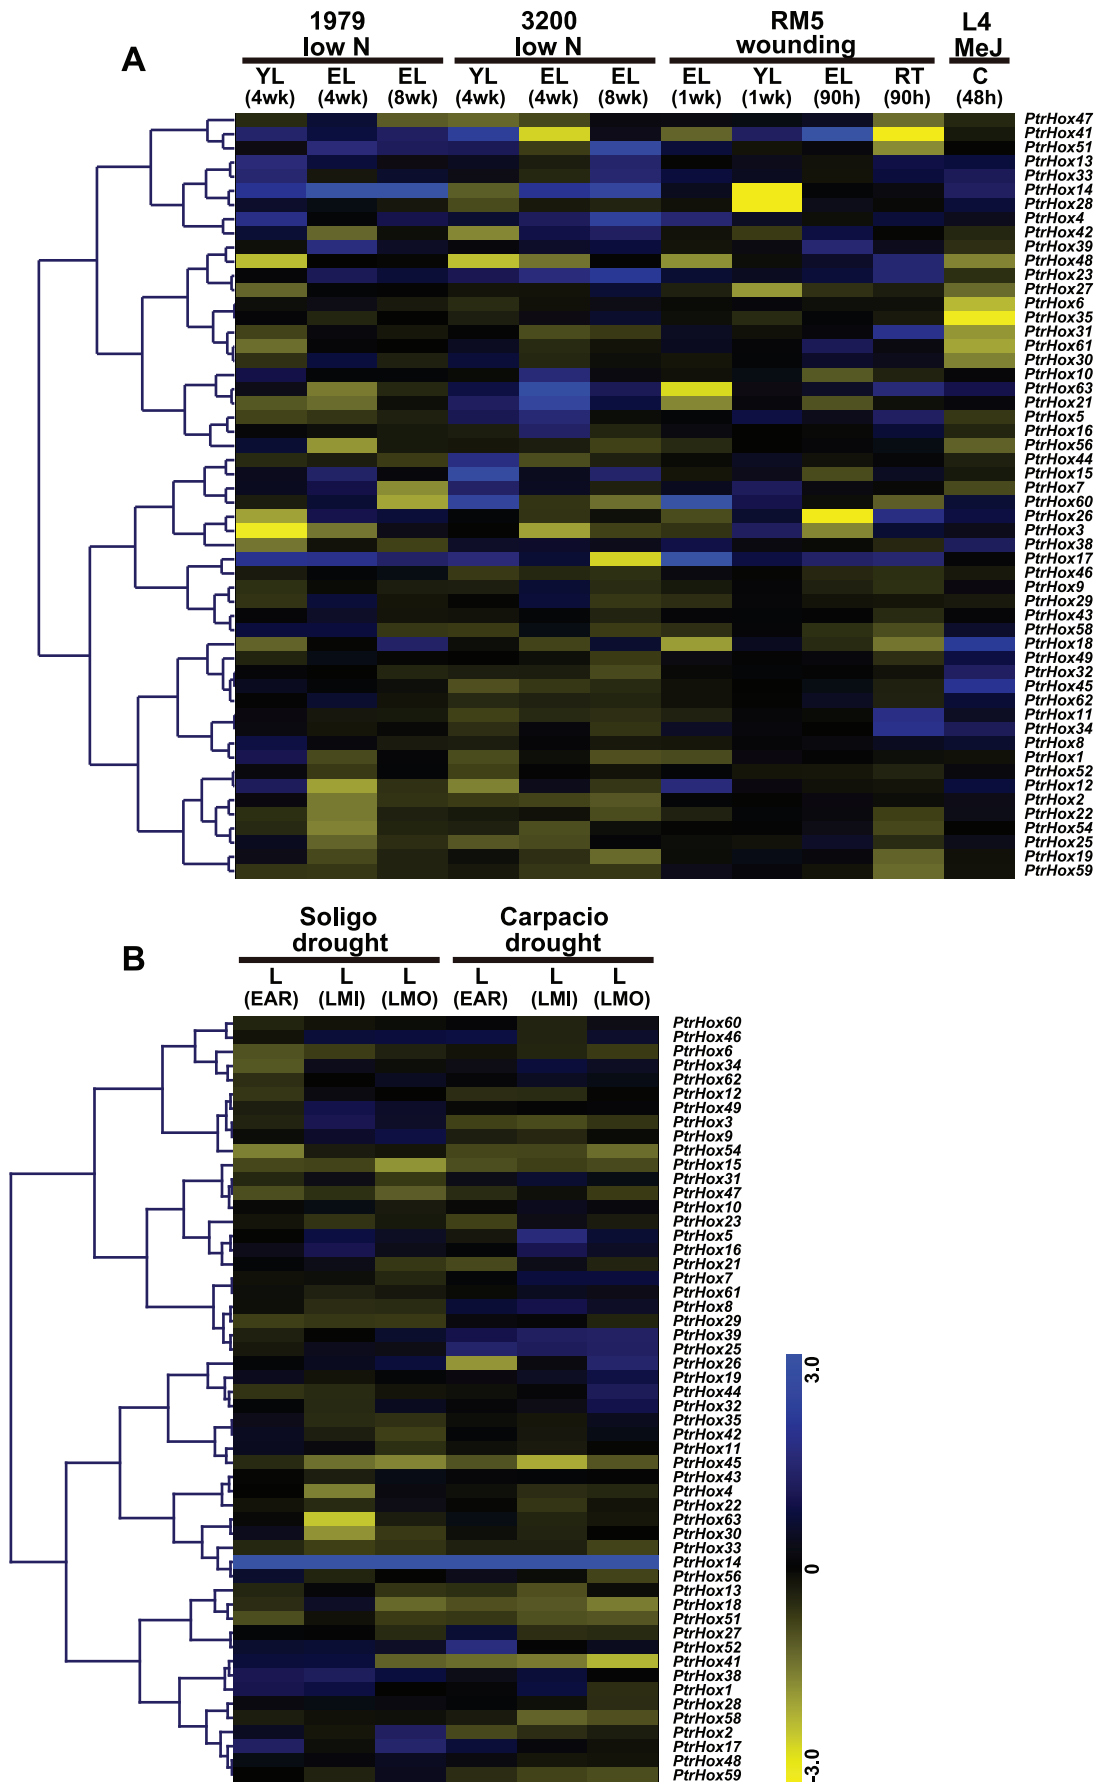

**Figure 10. Differential expression of *Populus* HD-ZIP genes under different abiotic stresses.** Expression is indicated as fold-change of experimental treatments relative to control samples and visualized in heatmaps (see Materials and Methods). Color scale represents log<sub>2</sub> expression values, yellow represents low level and blue indicates high level of transcript abundances. **A.** Heatmap showing hierarchical clustering of 54 *PtrHox* genes across various tissues and genotypes analyzed. Microarray data under the series accession number GSE16786 was obtained from NCBI GEO database. Genotypes analyzed included: *P. fremontii* × *angustifolia* clones 1979, 3200, and RM5, *P. tremuloides* clones 271 and L4, and *Populus deltoides* clones Soligo and Carpaccio. Tissues analyzed included: YL, young leaves; EL, expanding leaves; ML, mature leaves; RT, root tips; C, suspension cell cultures. Stress treatments included: low N, nitrogen limitation; MeJ, Methyl Jasmonate elicitation; wounding, sampled either one week or 90 hours after wounding. **B.** Heatmap showing hierarchical clustering of 54 *PtrHox* genes under short-term and long-term water deficit. Microarray data under the series accession number GSE17230 was obtained from NCBI GEO database. EAR, early response (EAR) to water deficit by 36 hours; LMI, long-term (10-day) response to mild stress with soil relative extractable water (REW) at 20–35%; LMO, long-term (10-day) response to moderate stress with soil relative extractable water (REW) at 10–20%. doi:10.1371/journal.pone.0031149.g010

rate of  $\lambda$  substitutions per synonymous site per year as  $T = Ks/2\lambda$  ( $\lambda = 9.1 \times 10^{-9}$  for *Populus*) [74].

### Gene structure analysis

The exon/intron organization for individual HD-ZIP gene was illustrated with Gene structure display server (GSDS) program (<http://gsds.cbi.pku.edu.cn/>) [83] by alignment of the cDNAs with their corresponding genomic DNA sequences from Phytozome (<http://www.phytozome.net/poplar>, release 2.1).

### Identification of conserved motifs

The program MEME (v4.3.0) (<http://meme.sdsc.edu>) was used for the elucidation of motifs in 63 deduced *Populus* HD-ZIP protein sequences. The following parameters were used: number of repetitions - any, maximum number of motifs - 20, and the optimum motif widths were constrained to between 6 and 200 residues. Structural motif annotation was performed using the SMART (<http://smart.embl-heidelberg.de>) and Pfam (<http://pfam.sanger.ac.uk>) databases.

### EST profiling and microarray analysis

The expression profile for each gene was obtained by evaluating its EST representation among 19 cDNA libraries derived from different tissues and/or developmental stages available at PopGenIE (<http://www.popgenie.org/>) [75]. The heatmap was visualized using Heatmapper Plus tool at the Bio-Array Resource for Plant Functional Genomics ([http://bar.utoronto.ca/ntools/cgi-bin/ntools\\_heatmapper\\_plus.cgi](http://bar.utoronto.ca/ntools/cgi-bin/ntools_heatmapper_plus.cgi)) [84].

The microarray data for various tissues/organs and developmental stages available at NCBI Gene Expression Omnibus (GEO) database [77] under the series accession numbers GSE13990 and GSE13043 were used for the tissue-specific expression analysis. The series GSE13990 includes Affymetrix microarray data from nine different tissue samples representing three biological replicates [61], whereas series GSE13043 contains NimbleGen microarray data from five stem internodes from the apical bud to the base of the shoot (internode 2 to internode 5, and internode 9) in two biological replicates [76]. For Affymetrix microarray data GSE13990, the Affymetrix CEL files representing nine tissues/organs as well as photoperiodic treatments were downloaded from GEO database at NCBI and imported into GeneSpring GX (V11.5) software (Agilent Technologies) for further analysis. The data was normalized by the Gene Chip Robust Multiarray Analysis (GCRMA) algorithm followed by log transformation and average calculation. After normalization and log transformation of data for all the *Populus* genes present on the chip, the log signal intensity values for *Populus* probe IDs corresponding to HD-ZIP gene model (v1.1) (Table 1 and Table S5) were extracted as a subset for further analyses. The tab-delimited files for the average log signal intensity values were imported into Genesis program (v1.75) to generate heatmaps [85]. Hierarchical clustering was performed

based on Pearson coefficients with average linkage rule. NimbleGen array data GSE13043 were normalized using the NimbleGen microarray data processing pipeline (NMPP) [86]. Each gene model is represented by three replicated 60 mer isothermal probes on the array. Background hybridization intensity for determining expressed genes was estimated using signal intensity of negative control probes on the array. Gene-level analyses were performed using the mean normalized fluorescence values for all probes and replicates. The log signal intensity values for *Populus* probe IDs corresponding to HD-ZIP gene model (v1.1) (Table 1 and Table S5) were extracted as a subset for further analyses. The tab-delimited files for the average log signal intensity values were imported into Genesis program (v1.75) to generate heatmaps [85]. Clustering of gene expression was performed using hierarchical algorithm based on Pearson correlations.

For abiotic and hormone treatments, Affymetrix microarray data available at NCBI GEO database under the series accession numbers GSE17230 (drought stress) and GSE17686 were analyzed [87,88]. GSE17686 is composed of the following five subset series: GSE14893 (nitrogen limitation, genotype 1979), GSE14515 (nitrogen limitation, genotype 3200), GSE16783 (one week after leaf wounding), GSE16785 (90 hours after leaf wounding) and GSE16773 (methyl jasmonate-elicited suspension cell cultures). The Affymetrix CEL files representing different abiotic and hormone treatments were downloaded from GEO database at NCBI and preprocessed by using GeneSpring GX (V11.5) software (Agilent Technologies). The data was normalized by GCRMA algorithm followed by log transformation and average calculation. After normalization and log transformation of data for all the *Populus* genes present on the chip, the log signal intensity values for *Populus* probe IDs corresponding to HD-ZIP gene model (v1.1) (Table 1 and Table S5) were extracted as a subset for further analyses. Expression was indicated as fold change of experimental treatments relative to control samples. The tab-delimited files for the average log signal intensity values were imported into Genesis program (v1.75) to generate heatmaps [85]. Hierarchical clustering was performed based on Pearson coefficients with average linkage rule.

Probe sets corresponding to HD-ZIP genes were identified using an online Probe Match tool available at POParray (<http://aspendb.uga.edu/poparray>). For probe sets matching several *Populus* HD-ZIP gene models, only those exhibited the highest hybridization signals consistently across multiple samples were considered. The list of probe sets corresponding to *Populus* HD-ZIP genes was provided in Table S5.

### Plant material and growth conditions

Plant material was collected from clonally propagated one-year-old *Populus deltoides* grown in the growth chamber under long day conditions (16 h light/8 h dark) at 25–28°C. Shoot tip from stem internodes 1–3, young leaves from stem internodes 4–6, and root

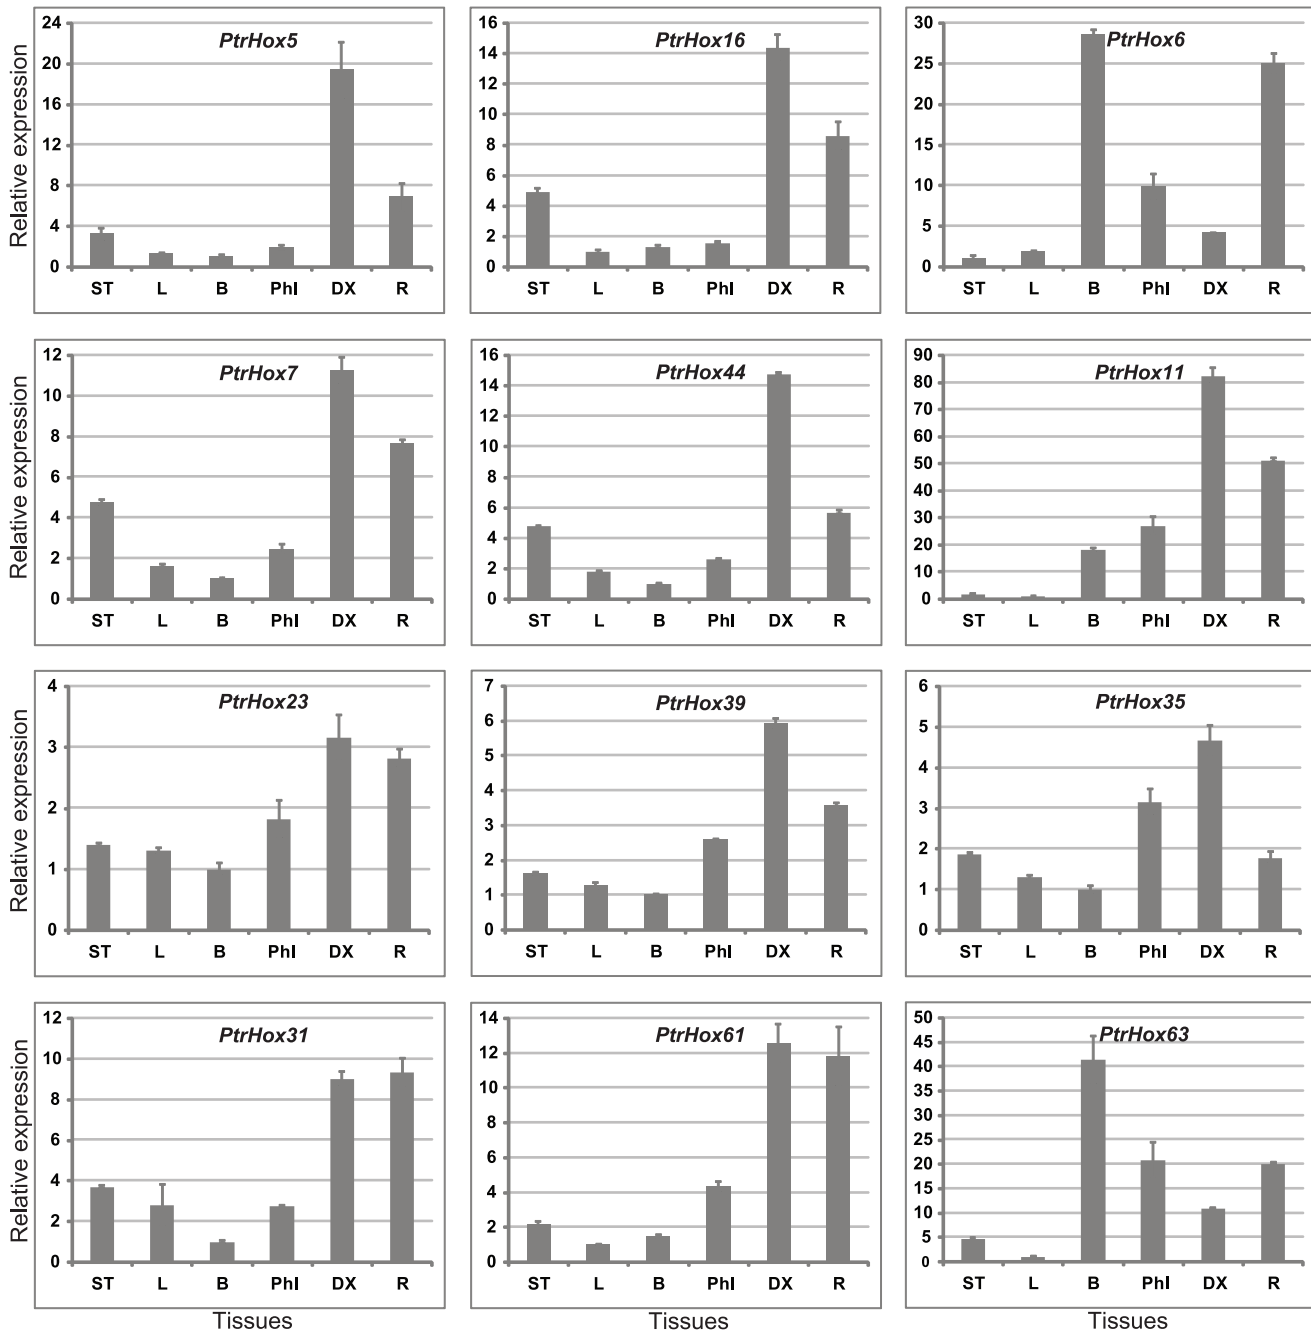

**Figure 11. Expression analysis of 12 selected HD-ZIP genes using qRT-PCR.** The relative mRNA abundance of 12 selected HD-ZIP genes was normalized with respect to two reference genes *UBQ10* and *UKN1* (*Populus* orthologue of *Arabidopsis AT4G33380*) in six different tissues. Bars represent standard deviations (SD) of three technical replicates. ST, shoot tips; L, leaves from 4–6 stem internodes; Phl, phloem; DX, differentiating xylem; R, roots; B, bark.  
doi:10.1371/journal.pone.0031149.g011

tissues were separately collected. Bark with phloem attached from the basal internodes was peeled off of the stem, phloem was scraped from the inside of the bark, and developing xylem was scraped from the outer layers of the wood. All samples were immediately frozen in liquid nitrogen and stored at  $-80^{\circ}\text{C}$  until RNA isolation.

The clonally propagated six-month-old Nanlin 895 (*Populus × euramericana* cv) plants were used in stress treatments. Salt stress was conducted by watering plants with sodium chloride (NaCl)

solution at concentration of 200 mM to saturation. For drought treatment, the intact root systems of plants were removed from the pots, washed gently with water to remove soil and then laid down on filter paper with 70–80% humidity at  $25^{\circ}\text{C}$  under dime light. Two biological replicates were performed for each stress treatment. After exposure to stresses after 0, 1, 3, 6, 9, 12, and 24 hours, young leaves from three different plants were harvested at various time points, flash frozen in liquid nitrogen, and stored at  $-80^{\circ}\text{C}$  for further analysis.

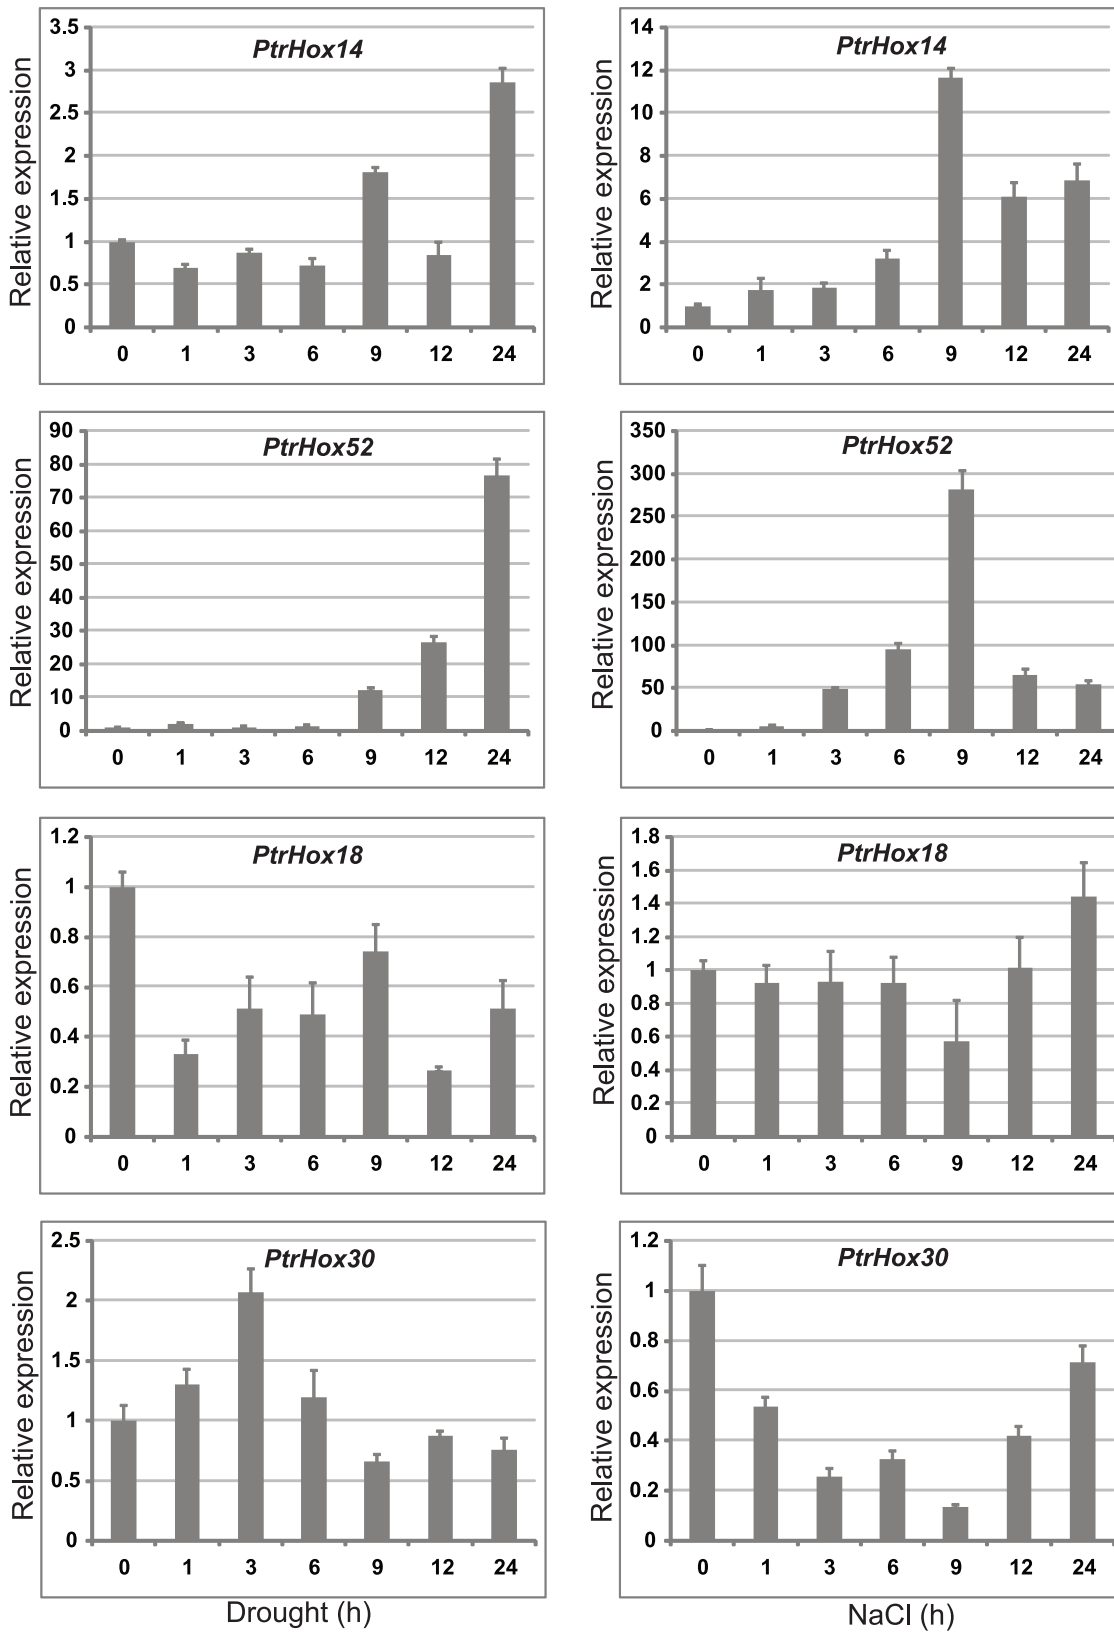

**Figure 12. Expression analysis of four selected HD-ZIP genes under drought and salinity stresses using qRT-PCR.** The relative mRNA abundance of four selected HD-ZIP genes was normalized with respect to two reference genes *UBQ10* and *PP2a* in drought and salinity stress treatments. Bars represent standard deviations (SD) of three technical replicates. X-axis is time courses of stress treatments for each gene. doi:10.1371/journal.pone.0031149.g012



## RNA isolation and qRT-PCR

Total RNA from shoot tip, leaf, differentiating xylem, and phloem was extracted using TRIzol reagent (Invitrogen, Ca, USA) according to manufacturer's instructions. Alternatively, total RNA from bark and roots was isolated by CTAB method with minor modifications [89]. RNA integrity was verified by 2% agar gel electrophoresis. Before cDNA synthesis, RNA was treated with RQ1 RNase-free DNase (Promega, Madison, WI, USA) according to the manufacturer's instructions to ensure no DNA contamination, and then the first-strand cDNA synthesis was carried out with approximately 2 µg RNA using the RevertAid First Strand cDNA Synthesis Kit (MBI, Fermentas) and oligo-dT primers according to the manufacturer's procedure. Primers were designed using Beacon Designer v7.0 (Premier Biosoft International, California, USA) with melting temperatures 58–60°C, primer lengths 20–25 bp and amplicon lengths 50–200 bp. All the primer sequences were listed in Table S6.

qRT-PCR was conducted on LightCycler® 480 Detection System (Roche, Penzberg, Germany) using SYBR Premix Ex Taq (TaKaRa, Toyoto, Japan). Reactions were prepared in a total volume of 20 µl containing: 10 µl of 2×SYBR Premix, 2 µl of cDNA template, 0.4 µl of each specific primer to a final concentration of 200 nM. The reactions were performed as the following conditions: initial denaturation step of 95°C for 10 s followed by two-step thermal cycling profile of denaturation at 95°C for 5 s, and combined primer annealing/extension at 60°C for 1 min for 40 cycles. No-template controls were included for each primer pair and each PCR reaction was performed in triplicate. To verify the specificity of the amplicon for each primer pair, a melting curve analysis was performed ranging from 60°C to 95°C with temperature increasing steps of 0.06°C/s (5 acquisitions per °C) at the end of each run. Baseline and threshold cycles (Ct) were automatically determined using the LightCycler® 480 Software release 1.5.0. Relative expression was calculated by the  $\Delta\Delta C_t$  method [90] using the geometric mean of two reference genes: *UBQ10* and *UKN1* (*Populus* orthologue of *Arabidopsis AT4G33380*) for different tissues, *UBQ10* and *PP2a* for abiotic stress treatments. The normalization factor (NF) of two reference genes was calculated and the relative abundance of target genes was analyzed using the geNorm (V3.5) software package [91].

## Supporting Information

**Figure S1 Exon/intron organization of *Populus* HD-ZIP genes.** Exons and introns are represented by green boxes and

black lines, respectively. The numbers indicate the splicing phases of the HD-ZIP genes, 0 refers to phase 0, 1 to phase 1, and 2 to phase 2.

(EPS)

**Table S1 A complete list of *Populus* HD-ZIP gene sequences identified in the present study.** The list

comprises of 63 HD-ZIP sequences identified in this study. Amino acid sequences were deduced from their corresponding coding sequences and genomic DNA sequences were obtained from Phytozome (<http://www.phytozome.net/poplar>, release 2.1).

(XLS)

**Table S2 A list of HD-ZIP protein sequences identified from eight plant species in this study.**

(TXT)

**Table S3 Pairwise identities between paralogous pairs of HD-ZIP genes from *Populus*.** Pairwise identities and sequence alignments of the 28 paralogous pairs identified from *Populus* HD-ZIP gene family.

(XLS)

**Table S4 Sequence logos for the conserved motifs of *Populus* HD-ZIP proteins.** Conserved motifs and the sequence

logos were generated using the MEME search tool. Numbers on the horizontal axis represent the sequence positions in the motifs and the vertical axis represents the information content measured in bits. Motif 1 and 2 represents the homeodomain (HD), motif 7 represents the Leucine-Zip domain (LZ), motif 3 represents the START domain, motif 13 and 19 represents MEKHLA, and motif 18 represents the CPSCE.

(XLS)

**Table S5 A list of probes corresponding to *Populus* HD-ZIP for microarray analysis.**

(XLS)

**Table S6 A list of primer sequences of the 16 selected HD-ZIP genes for qRT-PCR analysis.**

(XLS)

## Author Contributions

Conceived and designed the experiments: GZ DZ. Performed the experiments: RH GH. Analyzed the data: XC YK. Contributed reagents/materials/analysis tools: GC XW DS. Wrote the paper: RH.

## References

- Gehring WJ, Qian YQ, Billeter M, Furukubo-Tokunaga K, Schier AF, et al. (1994) Homeodomain-DNA recognition. *Cell* 78: 211–223.
- Mukherjee K, Brocchieri L, Burglin TR (2009) A comprehensive classification and evolutionary analysis of plant homeobox genes. *Mol Biol Evol* 26: 2775–2794.
- Ruberti I, Sessa G, Lucchetti S, Morelli G (1991) A novel class of plant proteins containing a homeodomain with a closely linked leucine zipper motif. *EMBO J* 10: 1787–1791.
- Sessa G, Morelli G, Ruberti I (1993) The Athb-1 and -2 HD-Zip domains homodimerize forming complexes of different DNA binding specificities. *EMBO J* 12: 3507–3517.
- Frank W, Phillips J, Salamini F, Bartels D (1998) Two dehydration-inducible transcripts from the resurrection plant *Craterostigma plantagineum* encode interacting homeodomain-leucine zipper proteins. *Plant J* 15: 413–421.
- Johannesson H, Wang Y, Engstrom P (2001) DNA-binding and dimerization preferences of Arabidopsis homeodomain-leucine zipper transcription factors in vitro. *Plant Mol Biol* 45: 63–73.
- Sessa G, Steindler C, Morelli G, Ruberti I (1998) The Arabidopsis Athb-8, -9 and -14 genes are members of a small gene family coding for highly related HD-ZIP proteins. *Plant Mol Biol* 38: 609–622.
- Aso K, Kato M, Banks JA, Hasebe M (1999) Characterization of homeodomain-leucine zipper genes in the fern *Ceratopteris richardii* and the evolution of the homeodomain-leucine zipper gene family in vascular plants. *Mol Biol Evol* 16: 544–552.
- Henriksson E, Olsson AS, Johannesson H, Johansson H, Hanson J, et al. (2005) Homeodomain leucine zipper class I genes in Arabidopsis. Expression patterns and phylogenetic relationships. *Plant Physiol* 139: 509–518.
- Hanson J, Johannesson H, Engstrom P (2001) Sugar-dependent alterations in cotyledon and leaf development in transgenic plants expressing the HDZhdip gene ATHB13. *Plant Mol Biol* 45: 247–262.
- Soderman E, Hjellstrom M, Fahleson J, Engstrom P (1999) The HD-Zip gene ATHB6 in Arabidopsis is expressed in developing leaves, roots and carpels and up-regulated by water deficit conditions. *Plant Mol Biol* 40: 1073–1083.
- Johannesson H, Wang Y, Hanson J, Engstrom P (2003) The Arabidopsis thaliana homeobox gene ATHB5 is a potential regulator of abscisic acid responsiveness in developing seedlings. *Plant Mol Biol* 51: 719–729.
- Soderman E, Mattsson J, Engstrom P (1996) The Arabidopsis homeobox gene ATHB-7 is induced by water deficit and by abscisic acid. *Plant J* 10: 375–381.
- Lee YH, Oh HS, Cheon CI, Hwang IT, Kim YJ, et al. (2001) Structure and expression of the Arabidopsis thaliana homeobox gene Athb-12. *Biochem Biophys Res Commun* 284: 133–141.
- Hjellstrom M, Olsson ASB, Engstrom P, Soderman EM (2003) Constitutive expression of the water deficit-inducible homeobox gene ATHB7 in transgenic

- Arabidopsis causes a suppression of stem elongation growth. *Plant, Cell & Environment* 26: 1127–1136.
16. Olsson AS, Engstrom P, Soderman E (2004) The homeobox genes ATHB12 and ATHB7 encode potential regulators of growth in response to water deficit in Arabidopsis. *Plant Mol Biol* 55: 663–677.
  17. Himmelbach A, Hoffmann T, Leube M, Hohener B, Grill E (2002) Homeodomain protein ATHB6 is a target of the protein phosphatase ABI1 and regulates hormone responses in Arabidopsis. *EMBO J* 21: 3029–3038.
  18. Wang Y, Henriksson E, Soderman E, Henriksson KN, Sundberg E, et al. (2003) The Arabidopsis homeobox gene, ATHB16, regulates leaf development and the sensitivity to photoperiod in Arabidopsis. *Dev Biol* 264: 228–239.
  19. Aoyama T, Dong CH, Wu Y, Carabelli M, Sessa G, et al. (1995) Ectopic expression of the Arabidopsis transcriptional activator Athb-1 alters leaf cell fate in tobacco. *Plant Cell* 7: 1773–1785.
  20. Kim YK, Son O, Kim MR, Nam KH, Kim GT, et al. (2007) ATHB23, an Arabidopsis class I homeodomain-leucine zipper gene, is expressed in the adaxial region of young leaves. *Plant Cell Rep* 26: 1179–1185.
  21. Tahir M, Belmonte MF, Elhiiti M, Flood H, Stasolla C (2008) Identification and characterization of PgHZ1, a novel homeodomain leucine-zipper gene isolated from white spruce (*Picea glauca*) tissue. *Plant Physiol Biochem* 46: 1031–1039.
  22. Ciabelli AR, Ciolfi A, Salvucci S, Ruzza V, Possenti M, et al. (2008) The Arabidopsis homeodomain-leucine zipper II gene family: diversity and redundancy. *Plant Mol Biol* 68: 465–478.
  23. Tron AE, Bertoncini CW, Chan RL, Gonzalez DH (2002) Redox regulation of plant homeodomain transcription factors. *J Biol Chem* 277: 34800–34807.
  24. Carabelli M, Morelli G, Whitelam G, Ruberti I (1996) Twilight-zone and canopy shade induction of the Athb-2 homeobox gene in green plants. *Proc Natl Acad Sci U S A* 93: 3530–3535.
  25. Delarue M, Prinsen E, Onckelen HV, Caboche M, Bellini C (1998) Sur2 mutations of Arabidopsis thaliana define a new locus involved in the control of auxin homeostasis. *Plant J* 14: 603–611.
  26. Sawa S, Ohgishi M, Goda H, Higuchi K, Shimada Y, et al. (2002) The HAT2 gene, a member of the HD-Zip gene family, isolated as an auxin inducible gene by DNA microarray screening, affects auxin response in Arabidopsis. *Plant J* 32: 1011–1022.
  27. Steindler C, Matteucci A, Sessa G, Weimar T, Ohgishi M, et al. (1999) Shade avoidance responses are mediated by the ATHB-2 HD-zip protein, a negative regulator of gene expression. *Development* 126: 4235–4245.
  28. Dezar CA, Giacomelli JI, Manavella PA, Re DA, Alves-Ferreira M, et al. (2011) HAHB10, a sunflower HD-Zip II transcription factor, participates in the induction of flowering and in the control of phytohormone-mediated responses to biotic stress. *J Exp Bot* 62: 1061–1076.
  29. Prigge MJ, Otsuga D, Alonso JM, Ecker JR, Drews GN, et al. (2005) Class III homeodomain-leucine zipper gene family members have overlapping, antagonistic, and distinct roles in Arabidopsis development. *Plant Cell* 17: 61–76.
  30. Baima S, Possenti M, Matteucci A, Wisman E, Altamura MM, et al. (2001) The Arabidopsis ATHB-8 HD-zip protein acts as a differentiation-promoting transcription factor of the vascular meristems. *Plant Physiol* 126: 643–655.
  31. Emery JF, Floyd SK, Alvarez J, Eshed Y, Hawker NP, et al. (2003) Radial patterning of Arabidopsis shoots by class III HD-ZIP and KANADI genes. *Curr Biol* 13: 1768–1774.
  32. Green KA, Prigge MJ, Katzman RB, Clark SE (2005) CORONA, a member of the class III homeodomain leucine zipper gene family in Arabidopsis, regulates stem cell specification and organogenesis. *Plant Cell* 17: 691–704.
  33. McConnell JR, Emery J, Eshed Y, Bao N, Bowman J, et al. (2001) Role of PHABULOSA and PHAVOLUTA in determining radial patterning in shoots. *Nature* 411: 709–713.
  34. Ohashi-Ito K, Fukuda H (2003) HD-zip III homeobox genes that include a novel member, ZeHB-13 (Zinnia)/ATHB-15 (Arabidopsis), are involved in procambium and xylem cell differentiation. *Plant Cell Physiol* 44: 1350–1358.
  35. Otsuga D, DeGuzman B, Prigge MJ, Drews GN, Clark SE (2001) REVOLUTA regulates meristem initiation at lateral positions. *Plant J* 25: 223–236.
  36. Zhong R, Ye ZH (1999) IFL1, a gene regulating interfascicular fiber differentiation in Arabidopsis, encodes a homeodomain-leucine zipper protein. *Plant Cell* 11: 2139–2152.
  37. Ponting CP, Aravind L (1999) START: a lipid-binding domain in StAR, HD-ZIP and signalling proteins. *Trends Biochem Sci* 24: 130–132.
  38. Schrick K, Nguyen D, Karlowski WM, Mayer KF (2004) START lipid/steroid-binding domains are amplified in plants and are predominantly associated with homeodomain transcription factors. *Genome Biol* 5: R41.
  39. Mukherjee K, Burglin TR (2006) MEKHLA, a novel domain with similarity to PAS domains, is fused to plant homeodomain-leucine zipper III proteins. *Plant Physiol* 140: 1142–1150.
  40. Baima S, Nobili F, Sessa G, Lucchetti S, Ruberti I, et al. (1995) The expression of the Athb-8 homeobox gene is restricted to provascular cells in Arabidopsis thaliana. *Development* 121: 4171–4182.
  41. Kim J, Jung JH, Reyes JL, Kim YS, Kim SY, et al. (2005) microRNA-directed cleavage of ATHB15 mRNA regulates vascular development in Arabidopsis inflorescence stems. *Plant J* 42: 84–94.
  42. Zhong R, Ye ZH (2007) Regulation of HD-ZIP III Genes by MicroRNA 165. *Plant Signal Behav* 2: 351–353.
  43. Juarez MT, Kui JS, Thomas J, Heller BA, Timmermans MC (2004) microRNA-mediated repression of rolled leaf1 specifies maize leaf polarity. *Nature* 428: 84–88.
  44. Mallory AC, Reinhart BJ, Jones-Rhoades MW, Tang G, Zamore PD, et al. (2004) MicroRNA control of PHABULOSA in leaf development: importance of pairing to the microRNA 5' region. *EMBO J* 23: 3356–3364.
  45. McHale NA, Koning RE (2004) MicroRNA-directed cleavage of Nicotiana sylvestris PHAVOLUTA mRNA regulates the vascular cambium and structure of apical meristems. *Plant Cell* 16: 1730–1740.
  46. Nakamura M, Katsumata H, Abe M, Yabe N, Komeda Y, et al. (2006) Characterization of the class IV homeodomain-Leucine Zipper gene family in Arabidopsis. *Plant Physiol* 141: 1363–1375.
  47. Rerie WG, Feldmann KA, Marks MD (1994) The GLABRA2 gene encodes a homeo domain protein required for normal trichome development in Arabidopsis. *Genes Dev* 8: 1388–1399.
  48. Di Cristina M, Sessa G, Dolan L, Linstead P, Baïma S, et al. (1996) The Arabidopsis Athb-10 (GLABRA2) is an HD-Zip protein required for regulation of root hair development. *Plant J* 10: 393–402.
  49. Masucci JD, Rerie WG, Foreman DR, Zhang M, Galway ME, et al. (1996) The homeobox gene GLABRA2 is required for position-dependent cell differentiation in the root epidermis of Arabidopsis thaliana. *Development* 122: 1253–1260.
  50. Ohashi Y, Oka A, Ruberti I, Morelli G, Aoyama T (2002) Entopically additive expression of GLABRA2 alters the frequency and spacing of trichome initiation. *Plant J* 29: 359–369.
  51. Abe M, Katsumata H, Komeda Y, Takahashi T (2003) Regulation of shoot epidermal cell differentiation by a pair of homeodomain proteins in Arabidopsis. *Development* 130: 635–643.
  52. Shen B, Sinkevicius KW, Selinger DA, Tarczynski MC (2006) The homeobox gene GLABRA2 affects seed oil content in Arabidopsis. *Plant Mol Biol* 60: 377–387.
  53. Kubo H, Peeters AJ, Aarts MG, Pereira A, Koornneef M (1999) ANTHOCYANINLESS2, a homeobox gene affecting anthocyanin distribution and root development in Arabidopsis. *Plant Cell* 11: 1217–1226.
  54. Robischon M, Du J, Miura E, Groover A (2011) The Populus class III HD ZIP, popREVOLUTA, influences cambium initiation and patterning of woody stems. *Plant Physiol* 155: 1214–1225.
  55. Du J, Miura E, Robischon M, Martinez C, Groover A (2011) The Populus Class III HD ZIP transcription factor POPCORONA affects cell differentiation during secondary growth of woody stems. *PLoS One* 6: e17458.
  56. Agalou A, Purwantomo S, Overnas E, Johannesson H, Zhu X, et al. (2008) A genome-wide survey of HD-Zip genes in rice and analysis of drought-responsive family members. *Plant Mol Biol* 66: 87–103.
  57. Tuskan GA, Difazio S, Jansson S, Bohlmann J, Grigoriev I, et al. (2006) The genome of black cottonwood, *Populus trichocarpa* (Torr. & Gray). *Science* 313: 1596–1604.
  58. Prigge MJ, Clark SE (2006) Evolution of the class III HD-Zip gene family in land plants. *Evol Dev* 8: 350–361.
  59. Itoh J, Hibara K, Sato Y, Nagato Y (2008) Developmental role and auxin responsiveness of Class III homeodomain leucine zipper gene family members in rice. *Plant Physiol* 147: 1960–1975.
  60. Cote CL, Boileau F, Roy V, Ouellet M, Levasseur C, et al. (2010) Gene family structure, expression and functional analysis of HD-Zip III genes in angiosperm and gymnosperm forest trees. *BMC Plant Biol* 10: 273.
  61. Wilkins O, Nahal H, Foong J, Provart NJ, Campbell MM (2009) Expansion and diversification of the Populus R2R3-MYB family of transcription factors. *Plant Physiol* 149: 981–993.
  62. Barakat A, Bagniewska-Zadworna A, Choi A, Plakkat U, DiLoreto DS, et al. (2009) The cinnamyl alcohol dehydrogenase gene family in Populus: phylogeny, organization, and expression. *BMC Plant Biol* 9: 26.
  63. Kalluri UC, Difazio SP, Brunner AM, Tuskan GA (2007) Genome-wide analysis of Aux/IAA and ARF gene families in Populus trichocarpa. *BMC Plant Biol* 7: 59.
  64. Hu R, Qi G, Kong Y, Kong D, Gao Q, et al. (2010) Comprehensive Analysis of NAC Domain Transcription Factor Gene Family in Populus trichocarpa. *BMC Plant Biol* 10: 145.
  65. Barakat A, Choi A, Yassin NB, Park JS, Sun Z, et al. (2011) Comparative genomics and evolutionary analyses of the O-methyltransferase gene family in Populus. *Gene* 479: 37–46.
  66. Zhuang J, Cai B, Peng RH, Zhu B, Jin XF, et al. (2008) Genome-wide analysis of the AP2/ERF gene family in Populus trichocarpa. *Biochem Biophys Res Commun* 371: 468–474.
  67. Tuominen LK, Johnson VE, Tsai CJ (2011) Differential Phylogenetic Expansions in BAHD Acyltransferases Across Five Angiosperm Taxa and Evidence of Divergent Expression Among Populus Paralogues. *BMC Genomics* 12: 236.
  68. Lindsey KT, Tuominen, Virgil E, Johnson, Tsai C-J (2011) Differential Phylogenetic Expansions in BAHD Acyltransferases Across Five Angiosperm Taxa and Evidence of Divergent Expression Among Populus Paralogues. *BMC Genomics* 12: 236.
  69. Blanc G, Wolfe KH (2004) Functional divergence of duplicated genes formed by polyploidy during Arabidopsis evolution. *Plant Cell* 16: 1679–1691.
  70. Blanc G, Wolfe KH (2004) Widespread paleopolyploidy in model plant species inferred from age distributions of duplicate genes. *Plant Cell* 16: 1667–1678.
  71. Maere S, De Bodt S, Raes J, Casneuf T, Van Montagu M, et al. (2005) Modeling gene and genome duplications in eukaryotes. *Proc Natl Acad Sci U S A* 102: 5454–5459.

72. Prince VE, Pickett FB (2002) Splitting pairs: the diverging fates of duplicated genes. *Nat Rev Genet* 3: 827–837.
73. Vandepoele K, Simillion C, Van de Peer Y (2003) Evidence that rice and other cereals are ancient aneuploids. *Plant Cell* 15: 2192–2202.
74. Lynch M, Conery JS (2000) The evolutionary fate and consequences of duplicate genes. *Science* 290: 1151–1155.
75. Sjodin A, Street NR, Sandberg G, Gustafsson P, Jansson S (2009) The Populus Genome Integrative Explorer (PopGenIE): a new resource for exploring the Populus genome. *New Phytol* 182: 1013–1025.
76. Dharmawardhana P, Brunner AM, Strauss SH (2010) Genome-wide transcriptome analysis of the transition from primary to secondary stem development in *Populus trichocarpa*. *BMC Genomics* 11: 150.
77. Barrett T, Edgar R (2006) Gene expression omnibus: microarray data storage, submission, retrieval, and analysis. *Methods Enzymol* 411: 352–369.
78. Guindon S, Gascuel O (2003) A simple, fast, and accurate algorithm to estimate large phylogenies by maximum likelihood. *Syst Biol* 52: 696–704.
79. Jones DT, Taylor WR, Thornton JM (1992) The rapid generation of mutation data matrices from protein sequences. *Comput Appl Biosci* 8: 275–282.
80. Tamura K, Peterson D, Peterson N, Stecher G, Nei M, et al. (2011) MEGA5: Molecular Evolutionary Genetics Analysis Using Maximum Likelihood, Evolutionary Distance, and Maximum Parsimony Methods. *Mol Biol Evol*.
81. Suyama M, Torrents D, Bork P (2006) PAL2NAL: robust conversion of protein sequence alignments into the corresponding codon alignments. *Nucleic Acids Res* 34: W609–612.
82. Yang Z (2007) PAML 4: phylogenetic analysis by maximum likelihood. *Mol Biol Evol* 24: 1586–1591.
83. Guo AY, Zhu QH, Chen X, Luo JC (2007) [GSDS: a gene structure display server]. *Yi Chuan* 29: 1023–1026.
84. Toufighi K, Brady SM, Austin R, Ly E, Provart NJ (2005) The Botany Array Resource: e-Northern, Expression Angling, and promoter analyses. *Plant J* 43: 153–163.
85. Sturn A, Quackenbush J, Trajanoski Z (2002) Genesis: cluster analysis of microarray data. *Bioinformatics* 18: 207–208.
86. Wang X, He H, Li L, Chen R, Deng XW, et al. (2006) NMPP: a user-customized NimbleGen microarray data processing pipeline. *Bioinformatics* 22: 2955–2957.
87. Cohen D, Bogeat-Triboulot MB, Tisserant E, Balzergue S, Martin-Magniette ML, et al. (2010) Comparative transcriptomics of drought responses in *Populus*: a meta-analysis of genome-wide expression profiling in mature leaves and root apices across two genotypes. *BMC Genomics* 11: 630.
88. Yuan Y, Chung JD, Fu X, Johnson VE, Ranjan P, et al. (2009) Alternative splicing and gene duplication differentially shaped the regulation of isochorismate synthase in *Populus* and *Arabidopsis*. *Proc Natl Acad Sci U S A* 106: 22020–22025.
89. Chang S, Puryear J, C J (1993) A simple and efficient method for isolating RNA from pine trees. *Plant Molecular Biology Reporter* 11: 113–116.
90. Livak KJ, Schmittgen TD (2001) Analysis of relative gene expression data using real-time quantitative PCR and the 2<sup>-Delta Delta C(T)</sup> Method. *Methods* 25: 402–408.
91. geNorm website. Available: [<http://medgen.ugent.be/~jvdesomp/genorm/>]. Accessed 2011 May 20.
