# Supplementary material for: Genome-Wide Identification, Evolutionary Expansion, and Expression Profile of Homeodomain-Leucine Zipper Gene Family in Poplar (Populus trichocarpa)
Source: PLoS One. 2012 Feb 16;7(2):e31149. doi: 10.1371/journal.pone.0031149 (PMC3281058; doi:10.1371/journal.pone.0031149)
Supplement: Table S5 — A list of probes corresponding to Populus HD-ZIP for microarray analysis. (XLS) [file pone.0031149.s006.xls]

## Sheet: Sheet1
Table S5. A list of probes corresponding to Populus HD-ZIP for microarray analysis.
No.	Gene symbol	Gene model (V2.1)	Gene Model (V1.1)	Corresponding NimbleGen ID	Corresponding Affymetrix ID
1	PtrHox1	POPTR_0001s02030.1	fgenesh4_pg.C_scaffold_29000247	TREE0002S00036496	PtpAffx.220072.1.S1_at
2	PtrHox2	POPTR_0001s11380.1	eugene3.00010699	TREE0002S00005175	PtpAffx.200333.1.S1_at
3	PtrHox3	POPTR_0001s15490.1	eugene3.00290072	TREE0002S00029449	PtpAffx.37056.1.A1_s_at
4	PtrHox4	POPTR_0001s18470.1	fgenesh4_pm.C_LG_I000546	TREE0002S00017077	PtpAffx.200626.1.S1_at
5	PtrHox5	POPTR_0001s18930.1/HB5	fgenesh4_pm.C_LG_I000560	TREE0002S00017079	PtpAffx.46164.1.S1_at
6	PtrHox6	POPTR_0001s23680.1	gw1.148.81.1	TREE0002S00039640	PtpAffx.54090.1.S1_at
7	PtrHox7	POPTR_0001s38120.1/HB4	estExt_fgenesh4_pg.C_LG_I2905	TREE0002S00002040	Ptp.548.1.S1_x_at
8	PtrHox8	POPTR_0001s40540.1	gw1.146.127.1	TREE0002S00039587	PtpAffx.95683.1.A1_at
9	PtrHox9	POPTR_0001s44540.1	gw1.XIII.2898.1	TREE0002S00026469	PtpAffx.211191.1.S1_at
10	PtrHox10	POPTR_0002s10080.1	estExt_fgenesh4_pm.C_LG_II0461	TREE0002S00003953	PtpAffx.112745.1.A1_at
11	PtrHox11	POPTR_0002s11410.1	estExt_fgenesh4_pg.C_LG_II1036	TREE0002S00002156	PtpAffx.12403.1.S1_at
12	PtrHox12	POPTR_0002s13720.1	estExt_fgenesh4_pm.C_LG_II0606	TREE0002S00003964	PtpAffx.202104.1.S1_s_at
13	PtrHox13	POPTR_0002s15610.1	eugene3.00021438	TREE0002S00005897	PtpAffx.202196.1.S1_s_at
14	PtrHox14	POPTR_0002s17680.1	fgenesh4_pm.C_LG_II000817	TREE0002S00017222	PtpAffx.1458.1.S1_at
15	PtrHox15	POPTR_0002s23080.1	estExt_fgenesh4_pm.C_LG_II1004	TREE0002S00003996	PtpAffx.21945.1.A1_at
16	PtrHox16	POPTR_0003s04860.1/HB6	estExt_fgenesh4_pg.C_LG_III0436	TREE0002S00002292	Ptp.1518.2.S1_a_at
17	PtrHox17	POPTR_0003s05100.1	estExt_fgenesh4_pg.C_LG_III0408	TREE0002S00002291	Ptp.1110.1.A1_s_at
18	PtrHox18	POPTR_0003s07760.1	fgenesh4_pm.C_LG_III000187	TREE0002S00017273	PtpAffx.11390.3.A1_a_at
19	PtrHox19	POPTR_0003s09470.1	gw1.III.2514.1	TREE0002S00022618	PtpAffx.203099.1.S1_at
20	PtrHox21	POPTR_0004s01980.1	fgenesh4_pg.C_LG_IV000079	TREE0002S00013649	PtpAffx.203700.1.S1_at
21	PtrHox22	POPTR_0004s07310.1	gw1.IV.3966.1	TREE0002S00022999	PtpAffx.204030.1.S1_at
22	PtrHox23	POPTR_0004s22090.1/HB2	estExt_Genewise1_v1.C_660759	TREE0002S00028599	PtpAffx.75093.1.S1_s_at
23	PtrHox25	POPTR_0005s12760.1	estExt_fgenesh4_pg.C_570199	TREE0002S00029032	PtpAffx.221996.1.S1_at
24	PtrHox26	POPTR_0005s17390.2	estExt_Genewise1_v1.C_LG_V4715	TREE0002S00000719	PtpAffx.27897.1.A1_at
25	PtrHox27	POPTR_0005s19080.1	gw1.V.4364.1	TREE0002S00023875	Ptp.3022.1.A1_s_at
26	PtrHox28	POPTR_0006s07100.1	fgenesh4_pg.C_LG_VI000532	TREE0002S00014492	PtpAffx.206172.1.S1_at
27	PtrHox29	POPTR_0006s11890.1	gw1.28.964.1	TREE0002S00040526	PtpAffx.219808.1.S1_at
28	PtrHox30	POPTR_0006s20820.1	fgenesh4_pm.C_LG_VI000496	TREE0002S00017547	PtpAffx.206476.1.S1_at
29	PtrHox31	POPTR_0006s25390.1/HB8	estExt_fgenesh4_pm.C_LG_VI0713	TREE0002S00004326	PtpAffx.9623.1.S1_s_at
30	PtrHox32	POPTR_0007s01370.1	fgenesh4_pg.C_LG_VII000112	TREE0002S00014771	PtpAffx.206918.1.S1_at
31	PtrHox33	POPTR_0007s05010.1	gw1.VII.1686.1	TREE0002S00024478	PtpAffx.4806.3.S1_a_at
32	PtrHox34	POPTR_0007s12450.1	grail3.0019015601	TREE0002S00019351	PtpAffx.207337.1.S1_s_at
33	PtrHox35	POPTR_0007s14590.1	estExt_Genewise1_v1.C_LG_VII0041	TREE0002S00000820	Ptp.3022.3.A1_at
34	PtrHox37	POPTR_0008s14770.1	estExt_fgenesh4_pg.C_LG_VIII1313	TREE0002S00003053	NA
35	PtrHox38	POPTR_0008s19900.1	eugene3.00081839	TREE0002S00008369	PtpAffx.208326.1.S1_at
36	PtrHox39	POPTR_0009s01990.1/HB1	gw1.IX.4748.1	TREE0002S00023463	Ptp.3430.1.S1_at
37	PtrHox41	POPTR_0010s10340.1	estExt_fgenesh4_pg.C_LG_X0852	TREE0002S00003144	PtpAffx.111515.1.S1_at
38	PtrHox42	POPTR_0010s12300.1	eugene3.00101057	TREE0002S00008929	PtpAffx.208056.1.S1_s_at
39	PtrHox43	POPTR_0011s00520.1	eugene3.00110213	TREE0002S00009262	PtpAffx.134258.1.A1_at
40	PtrHox44	POPTR_0011s10070.1/HB3	estExt_fgenesh4_pg.C_2360002	TREE0002S00028888	Ptp.548.1.S1_at
41	PtrHox45	POPTR_0011s11510.1	gw1.XI.3740.1	TREE0002S00025945	PtpAffx.209946.1.S1_s_at
42	PtrHox46	POPTR_0012s03080.1	gw1.XII.940.1	TREE0002S00026264	PtpAffx.210314.1.S1_at
43	PtrHox47	POPTR_0012s03550.1	estExt_fgenesh4_pm.C_LG_XII0033	TREE0002S00004591	PtpAffx.157477.1.S1_at
44	PtrHox48	POPTR_0012s07270.1	grail3.0015005801	TREE0002S00019132	PtpAffx.4687.1.S1_s_at
45	PtrHox49	POPTR_0012s13390.1	fgenesh4_pg.C_LG_XII001156	TREE0002S00016065	PtpAffx.210747.1.S1_at
46	PtrHox51	POPTR_0014s07130.1	fgenesh4_pg.C_LG_XIV000202	TREE0002S00016170	PtpAffx.28027.1.S1_s_at
47	PtrHox52	POPTR_0014s09860.1	eugene3.00140486	TREE0002S00010543	Ptp.1204.1.A1_at
48	PtrHox53	POPTR_0014s15010.1	estExt_fgenesh4_pm.C_LG_XIV0411	TREE0002S00004688	NA
49	PtrHox54	POPTR_0015s05050.1	fgenesh4_pg.C_scaffold_122000084	TREE0002S00034942	PtpAffx.215385.1.S1_at
50	PtrHox55	POPTR_0015s07640.1	fgenesh4_pm.C_LG_XV000148	TREE0002S00017977	NA
51	PtrHox56	POPTR_0015s13340.1	eugene3.00151195	TREE0002S00011143	PtpAffx.213077.1.S1_at
52	PtrHox58	POPTR_0017s01400.1	gw1.44.578.1	TREE0002S00041074	PtpAffx.221591.1.S1_at
53	PtrHox59	POPTR_0017s04820.1	eugene3.00640210	TREE0002S00029895	PtpAffx.222319.1.S1_at
54	PtrHox60	POPTR_0017s11800.1	gw1.XVII.1044.1	TREE0002S00027806	PtpAffx.14780.1.S1_at
55	PtrHox61	POPTR_0018s08110.1/HB7	fgenesh4_pg.C_LG_XVIII000250	TREE0002S00016876	PtpAffx.9623.3.A1_at
56	PtrHox62	POPTR_0018s13300.1	eugene3.00181192	TREE0002S00011950	PtpAffx.214582.1.S1_at
57	PtrHox63	POPTR_0149s00220.1	gw1.XVI.1869.1	TREE0002S00027567	PtpAffx.133756.1.A1_at
Note: NA, not available
